1 **A Systematic Analysis of Mosquito-Microbiome Biosynthetic Gene Clusters**  
2 **Reveals Antimalarial Siderophores that Reduce Mosquito Reproduction Capacity**

3

4 Jack G. Ganley,<sup>1</sup> Ashmita Pandey,<sup>3</sup> Kayla Sylvester,<sup>2</sup> Kuan-Yi Lu,<sup>2</sup> Maria Toro-Moreno,<sup>1</sup>  
5 Sina Rütschlin,<sup>4</sup> James M. Bradford,<sup>1</sup> Cody J. Champion,<sup>3</sup> Thomas Böttcher,<sup>4</sup> Jiannong  
6 Xu,<sup>3</sup> and Emily R. Derbyshire<sup>1,2,5\*</sup>

7

8

9

10

11 <sup>1</sup> Department of Chemistry, Duke University, Durham, NC, USA

12 <sup>2</sup> Department of Molecular Genetics and Microbiology, Duke University, Durham, NC,  
13 USA

14 <sup>3</sup> Department of Biology, Molecular Biology Program, New Mexico State University, Las  
15 Cruces, NM, USA.

16 <sup>4</sup> Department of Chemistry, Konstanz Research School Chemical Biology,  
17 Zukunftskolleg, University of Konstanz, Konstanz, Germany

18

19 <sup>5</sup>Lead Contact

20

21 \*Correspondence: [emily.derbyshire@duke.edu](mailto:emily.derbyshire@duke.edu) (E.R.D)

22

23

24

25

26

27 **ABSTRACT**

28 Advances in infectious disease control strategies through genetic manipulation of insect  
29 microbiomes have heightened interest in microbially produced small molecules within  
30 mosquitoes. Herein, 33 mosquito-associated bacterial genomes were mined and over 700  
31 putative biosynthetic gene clusters (BGCs) were identified, 135 of which belong to known  
32 classes of BGCs. After an in-depth analysis of the 135 BGCs, iron-binding siderophores  
33 were chosen for further investigation due to their high abundance and well-characterized  
34 bioactivities. Through various metabolomic strategies, eight siderophore scaffolds were  
35 identified in six strains of mosquito-associated bacteria. Among these, serratiochelin A  
36 and pyochelin were found to reduce female *Anopheles gambiae* overall fecundity likely by  
37 lowering their blood feeding rate. Serratiochelin A and pyochelin were further found to  
38 inhibit the *Plasmodium* parasite asexual blood and liver stages *in vitro*. Our work supplies  
39 a bioinformatic resource for future mosquito microbiome studies and highlights an  
40 understudied source of bioactive small molecules.

41

42 **KEYWORDS**

43 Mosquito-Microbiome; Biosynthetic Gene Clusters; Siderophores; *Anopheles*;  
44 *Plasmodium*

45

46

47 **INTRODUCTION**

48 Over the last decade, efforts to understand host-microbiome interactions mediated  
49 by small molecules have significantly increased (Medema, 2018; Milshteyn et al., 2018).  
50 Investigation of insect microbiomes has revealed the chemical diversity derived from  
51 complex microbial flora within insects (Beemelmans et al., 2016, 2017, Carr et al., 2012b,  
52 2012a; Ganley et al., 2018; Oh et al., 2009; Reimer et al., 2013). Yet, the majority of natural

53 product studies involving insect-associated microbes focus on a single molecule or group  
54 of molecules from individual strains, which are often linked to a particular phenotype or  
55 activity (Kroiss et al., 2010; Nollmann et al., 2015; Oh et al., 2009). Bioinformatic tools that  
56 predict BGCs is one route to reveal the biosynthetic potential of a microbial community.  
57 This approach has been utilized to survey the human gut (Donia et al., 2014) and oral  
58 microbiomes (Aleti et al., 2019) as well as plant microbiomes (Helfrich et al., 2018),  
59 however it has yet to be applied to insect microbiomes.

60         Within the insect family there is a pressing need to study *Anopheles* mosquitoes  
61 as they include the primary vectors for *Plasmodium* transmission, the causative agent of  
62 malaria, as well as other infectious agents. Previous work indicates that the mosquito gut  
63 flora is essential for insect development (Coon et al., 2014, 2016), can influence infectious  
64 disease transmission (Cirimotich et al., 2011; Ramirez et al., 2014; Stathopoulos et al.,  
65 2014), and has the capacity to produce antimalarial small molecules (Ganley et al., 2018;  
66 Saraiva et al., 2018). Efforts to control disease transmission through microbial interference  
67 of the vector microbiome have proven efficacious for both dengue fever (Jeffery et al.,  
68 2009) and malaria (Lovett et al., 2019; Shane et al., 2018; Wang et al., 2017) in laboratory  
69 and near-natural environments. Specifically, paratransgenesis studies have illustrated that  
70 heterologous expression of antimalarial (Shane et al., 2018; Wang et al., 2017) or  
71 insecticidal (Lovett et al., 2019) proteins or peptides in microbiome species can efficiently  
72 reduce parasite load or influence mosquito survival, respectively. Thus far, these  
73 approaches have primarily employed insect venom proteins as the inhibitory agent, but  
74 antimalarial or insecticidal small molecules are also attractive candidates (Kajla, 2019).

75         In this study, we completed an extensive bioinformatic analysis of the small  
76 molecule BGCs from mosquito-associated bacteria. We mined through 33 mosquito-  
77 associated bacterial genomes and identified over 700 putative BGCs. Further  
78 bioinformatic analysis indicated that siderophores, small molecules secreted to sequester

79 and replenish intracellular iron stocks, were highly represented within this bacterial sample  
80 set. Siderophores have been reported with diverse bioactivities (Johnstone and Nolan,  
81 2015) including *in vitro* and *in vivo* anti-*Plasmodium* activity (Atkinson et al., 1991; Fritsch  
82 et al., 1985; Shanzer et al., 1991). In the mosquito microbiome, we identified eight different  
83 siderophore scaffolds through a mass spectrometry analysis and subsequently obtained  
84 six purified compounds for bioactivity studies. The siderophores serratiochelin A (Araz and  
85 Budzikiewicz, 1994) and pyochelin (Cox et al., 1981) exhibited adverse effects on the  
86 blood feeding propensity and overall fecundity of female *A. gambiae* mosquitoes.  
87 Additionally, these compounds were identified as inhibitors of the liver- and asexual blood-  
88 stages of *Plasmodium* infection. Together, we find that bacterial siderophores are  
89 important mosquito-microbiome molecules and highlight two siderophores with activities  
90 against the mosquito vector and *Plasmodium* parasite. Identifying metabolites with these  
91 properties within the mosquito-microbiome lays the foundation for future paratransgenesis  
92 campaigns to reduce disease transmission and mosquito competence.

93

## 94 **RESULTS AND DISCUSSION**

95

### 96 ***In silico* identification of biosynthetic gene clusters from mosquito gut microbiome.**

97 We compiled publicly available bacterial genomes that were originally isolated  
98 from mosquitoes for analysis. This afforded 29 bacterial strains from *Anopheles*  
99 mosquitoes (*A. gambiae*, *A. stephensi*, *A. arabiensis*, and *A. sinensis*) and 4 strains from  
100 *Aedes* mosquitoes (*Ae. aegypti* and *Ae. albopictus*) (**Data Set S1A**). *Aedes* mosquitoes  
101 transmit avian malaria, *P. gallinaceum* (Alavi et al., 2003), as well as human infectious  
102 agents including dengue virus, Zika virus, and others (2016). As a relevant disease vector,  
103 *Aedes*-associated bacteria were also included in our data set. Due to the limited amount  
104 of genome sequencing data on mosquito-associated bacteria, especially when compared



105 to human microbiomes, our sample size is smaller than analogous studies (Aleti et al.,  
106 2019; Donia et al., 2014; Helfrich et al., 2018), however this enabled an in-depth  
107 bioinformatic analysis. Despite this size, our data set well-represents the unique gut  
108 microbiome of mosquitoes. Our previous metagenomic study demonstrated that within the  
109 gut microbiota of field-caught *A. gambiae* mosquitoes four days post blood-meal, 5  
110 bacterial genera (*Serratia*, *Elizabethkingia*, *Acinetobacter*, *Enterobacter*, and  
111 *Pseudomonas*) constitute 84 % of the 16S rRNA reads (Wang et al., 2011), all of which  
112 are represented within our sample set.

113 A phylogenetic tree comparing the 33 bacterial strains was generated (**Figure**  
114 **1**). The best-represented bacterial phylum in our sample set was *Proteobacteria* (16  $\gamma$ -  
115 *Proteobacteria*, 1  $\beta$ -*Proteobacteria*, and 3  $\alpha$ -*Proteobacteria*), consistent with reports  
116 showing *Proteobacteria* are often the overwhelming microbial phylum in the midgut of  
117 field-caught *Anopheles* mosquitoes (Wang et al., 2011). Species in the *Bacteroidetes*  
118 phylum, which include *Elizabethkingia* spp., were the second most recurrent group (4  
119 *Elizabethkingia* spp. and 1 *Sphingobacterium* sp.) in our analysis. *Elizabethkingia* spp. are  
120 well-established mosquito symbionts that are the dominant species within midguts 4- and  
121 7-days post-blood meal (PBM) as well as 7-days after sugar feeding of *A. gambiae*  
122 mosquitoes (Wang et al., 2011).

123 Each bacterial genome was subjected to a bioinformatic analysis to predict their  
124 biosynthetic potentials. ClusterFinder (Cimermancic et al., 2014), a Markov model-based  
125 probabilistic algorithm that identifies BGCs from known and unknown classes, was used  
126 to survey the genomes. From our analysis, 719 total BGCs were identified by  
127 ClusterFinder. Of the 719 BGCs, antiSMASH (Blin et al., 2017), a bioinformatic tool to  
128 detect BGCs in defined classes, identified 135 BGCs of various types (**Figure 2A, Data**  
129 **Set S1B**). The heat map in **Figure 1** indicates the classes of antiSMASH BGCs as well  
130 as the number of BGCs in each strain. We observed that nonribosomal peptide synthetase

131 (NRPS)-independent (NI) siderophores, terpenes, and bacteriocins were well-distributed  
132 phylogenetically, while classes like aryl polyenes and homoserine lactones are limited to  
133 distinct phyla. The most frequent BGCs were NRPS clusters (38/135), which were almost  
134 exclusively found in *Proteobacteria*, specifically *Chromobacterium*, *Serratia*, and  
135 *Pseudomonas* spp. Bacteriocins (20/135), NI siderophores (18/135), and terpenes  
136 (15/135) were also prevalent BGCs (**Figure 2B**). When present within genomes, NRPS  
137 clusters were found in higher numbers (>4) when compared to other classes. This  
138 abundance hints at potentially important roles for molecules synthesized by NRSPs within  
139 these organisms. Conversely, there was a surprising lack of modular type-I polyketide  
140 synthases (PKSs) detected in this analysis, a class often reported in human and plant  
141 microbiome studies (Donia et al., 2014; Helfrich et al., 2018). Specifically, only two  
142 modular type-1 PKS BGCs (**Data Set S2**, Clusters Asaia15 and Chromobacterium11)  
143 were identified.

144 To evaluate the associated secondary metabolites from BGCs we assigned  
145 putative physiological functions to the 135 antiSMASH clusters. Since BGCs within the  
146 same antiSMASH classification can encode for various types of metabolites with diverse  
147 bioactivities, we compared each cluster to the phylogenetically-closest characterized  
148 natural product cluster with established biological activity (**Data Set S1C**, see **Materials**  
149 **& Methods** for more details). Natural products can have multiple physiological functions,  
150 including functions that have yet to be discovered, therefore we binned by the best-  
151 characterized function. This approach was especially useful for identifying redundant  
152 BGCs, as some of the strains within our dataset contain nearly identical genomes (i.e.  
153 *Serratia* sp. Ag1 and *Serratia* sp. Ag2, 98.5523% symmetrical identity). After excluding the  
154 redundant BGCs (**Data Set S1D**), the 93 remaining unique antiSMASH BGCs were  
155 ascribed to one of the following predicted functions: Unknown, siderophore, pigment,  
156 autoinducer, antimicrobial, other, resorcinol, and lipid/sterol (**Figure 2C**). From this

157 analysis, it was apparent that the sample set contains many BGCs that likely produce  
158 uncharacterized molecules, as more than one third of the BGCs have no closely  
159 associated characterized BGC. The antiSMASH clusters with unknown predicted function  
160 encompassed various classes, including NRPS, hybrid, terpene, bacteriocin, and  
161 thiopeptide BGCs. This suggests that these strains are untapped sources of undiscovered  
162 molecules. In particular, *Chromobacterium* sp. Panama (Ramirez et al., 2014), *Serratia*  
163 *fonticola* AeS1, *Kosakonia cowanii* Esp\_Z (Cirimotich et al., 2011), and *Lysinibacillus* sp.  
164 AR18-8 have a disproportionately high amount of unknown BGCs. Together these strains  
165 contain approximately half of the unknown BGCs (19/39), making them attractive  
166 candidates for future natural product discovery campaigns. To further validate our  
167 approach, we complemented our bioinformatics analysis with a mass spectrometry study.

168

#### 169 **Identification of mosquito-gut microbiome siderophores.**

170 Siderophores were the most abundant functional prediction from our analysis,  
171 constituting 17 unique BGCs, 7 of which were detected in more than one strain.  
172 Canonically, siderophores are synthesized and secreted by organisms in low-iron  
173 environments to sequester and retrieve Fe<sup>3+</sup> for typical cellular processes like respiration  
174 and DNA synthesis (Lankford and Byers, 1973). This function is particularly compelling in  
175 the context of mosquito biology as the iron-binding small molecules would directly interact  
176 with the *Plasmodium* parasite in the midgut during the extracellular sexual reproduction  
177 stage. To investigate these possible siderophores, six mosquito-microbiome strains  
178 (covering 9 of the 17 siderophore BGCs) were acquired and grown in standard versus  
179 iron-limited media. Since FeCl<sub>3</sub> typically arrests siderophore production, an Fe-dependent  
180 change in a metabolite level can facilitate siderophore detection by mass spectrometry.  
181 Analyzed strains included *Serratia* sp. Ag2, *Serratia* sp., *Enterobacter* sp. Ag1,  
182 *Pseudomonas* sp. Ag1, *Acinetobacter* sp. Ag1, and *E. anophelis* Ag1 (**Data Set S1E**).

183 *Serratia* sp. (Ganley et al., 2018) was used in place of *S. marcescens* AS1 as it has 99 %  
184 16S rRNA identity and contains identical siderophore BGCs. Differential metabolomics  
185 was then employed to identify metabolites upregulated in iron-deficient conditions, which  
186 were further investigated by tandem mass spectrometry (MS/MS) analysis (**Figure 3, Fig.**  
187 **S1, Data Set S3**). This approach identified serratiochelin A and B from *Serratia* sp. (**Figure**  
188 **3A**), pyochelin (Ganley et al., 2020) and the related metabolite dihydroaeruginosic acid from  
189 *Pseudomonas* sp. Ag1 (**Figure 3B**), and aerobactin from *Enterobacter* sp. Ag1 (**Figure**  
190 **3C**). As predicted by our BGC analysis, some strains produce multiple siderophores.  
191 Additional targeted metabolomic searches identified five other siderophore scaffolds  
192 including, chrysobactins (*Serratia* sp., **Figure S2**), enterobactin (*Serratia* sp. Ag2, **Figure**  
193 **S3A–C**), acinetoferrin (*Acinetobacter* sp. Ag1, **Figure S1F**), bisucaberin (*E. anophelis*  
194 Ag1, **Figure S3D–G**), and pyoverdine (*Pseudomonas* sp. Ag1, **Figure S4**) (**Figure 3D**).  
195 Interestingly, *Pseudomonas* sp. Ag1 produces a previously undiscovered pyoverdine  
196 named pyoverdine Ag1 in addition to pyochelin. We predict a putative pyoverdine Ag1  
197 structure by combining MS/MS and biosynthetic predictions (**Figure S4**), however full  
198 structure elucidation awaits 2D NMR characterization.

199 Our study provides a blueprint of siderophores employed by mosquito-associated  
200 bacteria. While some of these strains are well-studied for their chemical potential, few  
201 reports exist on the secondary metabolites of the emerging nosocomial pathogen *E.*  
202 *anophelis*. We found that this bacterium contains a BGC homologous to a  
203 desferrioxamine-like BGC that is conserved across species. Additionally, the metabolomic  
204 and MS/MS results indicated that the cyclic hydroxamate siderophore bisucaberin is  
205 produced in metal-depleted *E. anophelis* Ag1 culture (**Figure S3D–H**). Bisucaberin was  
206 initially described in marine species of *Aliivibrio* (Winkelmann et al., 2002) and  
207 *Alteromonas* (Takahashi et al., 1987). In *Shewanella algae*, bisucaberin is simultaneously  
208 produced with avaroferrin and putrebactin via the same BGC and ratios of these

209 compounds were controlled by substrate availability (Böttcher and Clardy, 2014; Rütshlin  
210 et al., 2017). Interestingly, entomopathogenic *Xenorhabdus szentirmaii* only produced  
211 putrebactin and avaroferrin (Hirschmann et al., 2017), while in our analysis of *E. anophelis*  
212 Ag1 only bisucaberin was detected, suggesting great diversity and fine control of the ratio  
213 of these siderophores by different species. Overall, all of the siderophores identified by  
214 MS were putatively assigned to a BGC (**Data Set S1E**) and then prioritized for bioactivity  
215 studies. Among the siderophores identified, six compounds were attained through either  
216 isolation from the producing bacterial strain, *in vitro* production and isolation, or  
217 purchasing, (see **Resources Table** for siderophore source).

218

### 219 **The mosquito-microbiome siderophores, serratiochelin A and pyochelin reduce** 220 **blood feeding propensity and overall fecundity.**

221 Serratiochelin A, pyochelin, and aerobactin could be produced or purchased in  
222 quantities sufficient for bioactivity assays in *A. gambiae*, including evaluation of mosquito  
223 survival, feeding rate, and fecundity. In these experiments, siderophores (100  $\mu$ M) were  
224 provided to 100 female mosquitoes with a sugar-meal for three days before a blood meal.  
225 Engorged female mosquitoes were then separated and dissected three days thereafter  
226 (**Figure 4A**). Over the three days of siderophore supplementation, survival rates of female  
227 mosquitoes were monitored. After averaging survival of siderophore-fed female  
228 mosquitoes across three biological replicates, we observed no consistent reduction in  
229 survival among siderophore-fed female mosquitoes (**Figure 4B**), however serratiochelin  
230 A and pyochelin showed some toxicity in survival curves of individual replicates (**Figure**  
231 **S5**). Additionally, we recorded the percentage of female mosquitoes that took a blood  
232 meal post-siderophore feeding. Compared to the DMSO vehicle control where 53% of  
233 mosquitoes fed, pyochelin caused a significant reduction in blood feeding propensity  
234 across the three biological replicates, where only 37 % took blood meals (**Figure 4C**).

235 Since the three biological replicates had variable sample sizes, we pooled the blood  
236 feeding propensity to observe the total percent of engorged females (**Figure 4D**). After  
237 pooling the data across the three biological replicates, serratiochelin A and pyochelin both  
238 caused a significant reduction in blood feeding propensity at the population level,  
239 suggesting the general health of these mosquitoes may be affected by the compounds.  
240 However, survival of the engorged females was monitored post-blood meal from days 4–  
241 6 and no significant reduction in health was observed (**Figure 4E**). Next, the number of  
242 eggs in each mosquito ovary was assessed after dissection of the engorged females.  
243 Compared to the DMSO vehicle control, there was no significant change in the average  
244 number of eggs per mosquito for any of the siderophores across the three biological  
245 replicates (**Figure 4F**). Although the average number of eggs per mosquito had no  
246 significant reduction among blood fed mosquitoes, serratiochelin A and pyochelin both  
247 caused greater than a 2-fold decrease in the population's overall fecundity (total egg  
248 number/total starting mosquitoes) when compared to the DMSO vehicle (**Figure 4G**).  
249 Since blood meals are required for egg production and pathogen transmission, the  
250 observed reduction in blood feeding propensity is likely the main contributors to the overall  
251 fecundity reduction. This effect may influence the transmission capacity of mosquito-borne  
252 infectious diseases, like malaria. This strategy was recently highlighted by Vosshall and  
253 colleagues. Specifically, they discovered compounds that target mosquito peptide  
254 receptors and suppress attraction and blood-feeding on live hosts (Duvall et al., 2019).  
255 This further illustrates the appeal of the blood-feeding suppression demonstrated by both  
256 serratiochelin A and pyochelin.

257

258

259 **Serratiochelin A and pyochelin inhibit *Plasmodium* parasites.**

260 All six of the isolated or purchased siderophores were screened for activity in  
261 standard anti-*Plasmodium* assays that are available in high-throughput format. As an initial  
262 screen, siderophores (10  $\mu$ M) were tested for inhibition of *P. berghei* (rodent-infective)  
263 parasite load in HuH7 hepatoma cells (**Figure 5A**). Three siderophores that significantly  
264 reduced parasite load in the initial screen were selected for dose-response analysis.  
265 Serratiochelin A and pyochelin inhibited *P. berghei* parasite load with EC<sub>50</sub> values of 1.6  
266  $\mu$ M and 510 nM, respectively (**Figure 5B**), while no concentration dependence of inhibition  
267 was observed for aerobactin (**Figure S6D–E**). Importantly, serratiochelin A and pyochelin  
268 exhibit no HuH7 cytotoxicity under our assay conditions (**Figure S6A–C**). Evaluation of  
269 cytotoxicity is a necessary control to establish that *P. berghei* inhibition is not due to host  
270 cell toxicity. We further found that serratiochelin A and pyochelin inhibit the blood-stage of  
271 *P. falciparum* (human-infective) with EC<sub>50</sub> values of 10 and 6.6  $\mu$ M, respectively (**Figure**  
272 **6C**). Together, this demonstrates inhibition of multiple species and stages of the  
273 *Plasmodium* life cycle. Activity against *Plasmodium* gametocyte or mosquito stages is an  
274 especially attractive activity for candidate small molecules to reduce malaria transmission.  
275 Importantly, iron chelators including FBS0701 and deferoxamine, have been shown to  
276 inhibit gametocyte development (Ferrer et al., 2015). This suggests that other compounds  
277 that reduce iron levels, like siderophores, have potential to block the transmission of  
278 malaria.

279 To evaluate whether the siderophores included in our study are produced within  
280 mosquitoes, lab-reared *A. gambiae* mosquitoes were analyzed to determine endogenous  
281 serratiochelin A and pyochelin levels. Neither sugar-fed male/female mosquitoes nor  
282 blood-fed female mosquitoes contained serratiochelin A or pyochelin at detectable  
283 concentrations (<10 pg per mosquito) despite containing known producing strains.  
284 However, we detected ~ 0.7 ng of serratiochelin A per mosquito in lab-reared female *A.*  
285 *stephensi* mosquitoes (**Figure S7**), indicating that this siderophore is capable of being



286 produced within mosquitoes. Thus, from our initial survey of over 700 mosquito  
287 microbiome BGCs, we discovered numerous microbial metabolites including a natural  
288 product with activity against multiple *Plasmodium* life cycle stages that is additionally  
289 produced within live mosquitoes. The adverse effects of serratiochelin A and pyochelin  
290 against *A. gambiae* survival, blood-feeding rates, and overall fecundity, as well as the  
291 potential for anti-*Plasmodium* activity, makes these small molecules possible candidates  
292 for mosquito population control and transmission control of the *Plasmodium* parasite.

293

#### 294 **Potential value of siderophores in a future paratransgenesis campaign.**

295 Current paratransgenesis techniques involve the heterologous expression of one  
296 or multiple exogenous biomacromolecules that reduce parasite load within *Anopheles*  
297 mosquitoes (Shane et al., 2018; Wang et al., 2017). Previous studies have employed *S.*  
298 *marcescens* AS1 as a heterologous host due to its natural occurrence within the *A.*  
299 *stephensi* microbiome and because of its ability to vertically disperse through multiple  
300 generations of mosquitoes in a laboratory setting. Expression of various antimalarial  
301 effector molecules in *S. marcescens* AS1 dramatically reduces parasite load within *A.*  
302 *stephensi* making this an exciting avenue for possible malaria control (Wang et al., 2017).  
303 Siderophores are also attractive candidates for this campaign as their well-studied BGCs  
304 are relatively short in base-pair length in comparison to large lipopeptide and macrocycle  
305 BGCs thus, facilitating efforts to heterologously express and/or manipulate siderophore  
306 BGCs for paratransgenesis applications. The combined reduction in overall fecundity with  
307 the anti-*Plasmodium* activity of serratiochelin A enhances its future potential as a  
308 paratransgenesis tool. Fortuitously, wild type *S. marcescens* AS1 naturally contains the  
309 BGC to produce serratiochelin A and therefore, genetic manipulation to constitutively  
310 express this BGC in *S. marcescens* AS1 is a feasible alternative or additive approach to  
311 current efforts.



312           Gaining a critical understanding of the repertoire of small molecules within  
313 ecological niches is a principal feat when attempting to understand or manipulate the  
314 chemical dynamics of a microenvironment. Within the gut of mosquitoes, a complex matrix  
315 of inter- and intra-kingdom interactions exist. Advances in bioinformatics, metagenomics,  
316 metatranscriptomics, metabolomics, bacterial isolation techniques, and many other areas  
317 has facilitated our ability to identify small molecules produced within microbiomes and the  
318 BGCs enabling their production. The ability to resolve and manipulate this ecosystem has  
319 promising implications for reducing the transmission capacity of various infectious  
320 diseases.

321           The work described herein provides a detailed bioinformatic analysis of the BGCs  
322 of prominent mosquito-associated bacterial species and serves as a useful resource for  
323 future studies exploring various aspects of chemical ecology within mosquitoes. Our  
324 efforts focused on a fraction of the numerous groups of small molecules that are potentially  
325 produced within mosquitoes. In addition to highlighting the potential to discover novel  
326 small molecules within this system, we identified two anti-*Plasmodial* compounds that  
327 hinder the overall reproduction capacity of *Anopheles* mosquitoes. Taken together, this  
328 work encourages future endeavors to understand and potentially manipulate the chemical  
329 ecology within mosquitoes.

330

### 331 **AUTHOR CONTRIBUTIONS**

332 J.G.G. performed bioinformatic analyses, siderophore isolations and identification, and  
333 mass spectroscopy studies, A.P. and C.J.C., performed all mosquito assays., K.S. and  
334 M.T-M. performed liver-stage and cytotoxicity studies; S.R. and T.B. prepared chemical  
335 authentic standards and provided siderophore expertise; K.L. performed blood-stage  
336 assays; J.M.B. performed isolation and characterization of siderophores; J.G.G., J.X., and

337 E.R.D designed the experiments and analyzed the data; J.G.G. and E.R.D wrote the  
338 manuscript; and all authors commented on the manuscript.

339

#### 340 **ACKNOWLEDGMENTS**

341 We thank the American Association for the Advancement of Science (Marion Milligan  
342 Mason awarded to E.R.D) and Duke University for supporting this research. J.G.G. is  
343 grateful for support from a Burroughs-Wellcome fellowship from the Duke University  
344 Chemistry Department. J.X was supported by the National Institutes of Health  
345 (SC1AI112786) and the National Science Foundation (#1633330). We thank Dr. Peter  
346 Silinski for mass spectrometry assistance and Dr. David Gooden for preparative HPLC  
347 use. The following reagents were obtained through BEI Resources Repository, NIAID,  
348 NIH: *Plasmodium falciparum*, Strain 3D7, MRA-102, contributed by Daniel J. Carucci;  
349 *Leucobacter* sp., Strain Ag1, NR-50119; *Acinetobacter* sp., Strain Ag1, NR-50121;  
350 *Serratia* sp., Strain Ag2, NR-50123; *Elizabethkingia anophelis*, Strain Ag1, NR-50124; and  
351 *Cedecea (Enterobacter)* sp., Strain Ag1, NR-50125.

352 We declare that we have no conflicts of interest.

353

354

#### 355 **REFERENCES**

356 Alavi, Y., Arai, M., Mendoza, J., Tufet-Bayona, M., Sinha, R., Fowler, K., Billker, O.,  
357 Franke-Fayard, B., Janse, C.J., Waters, A., et al. (2003). The dynamics of interactions  
358 between Plasmodium and the mosquito: a study of the infectivity of Plasmodium berghei  
359 and Plasmodium gallinaceum, and their transmission by Anopheles stephensi,  
360 Anopheles gambiae and Aedes aegypti. *Int. J. Parasitol.* 33, 933–943.  
361 Aleti, G., Baker, J.L., Tang, X., Alvarez, R., Dinis, M., Tran, N.C., Melnik, A. V, Zhong,  
362 C., Ernst, M., Dorrestein, P.C., et al. (2019). Identification of the Bacterial Biosynthetic  
363 Gene Clusters of the Oral Microbiome Illuminates the Unexplored Social Language of  
364 Bacteria during Health and Disease. *MBio* 10, e00321-19.  
365 Altschul, S., Madden, T.L., Schäffer, A.A., Zhang, J., Zhang, Z., Miller, W., and Lipman,  
366 D.J. (1997). Gapped BLAST and PSI-BLAST: a new generation of protein database  
367 search programs. *Nucleic Acids Res.* 25, 3389–3402.  
368 Araz, K.T., and Budzikiewicz, H. (1994). Serratiochelin, a New Catecholate Siderophore  
369 from *Serratia marcescens*. *Z. Naturforsch* 49, 11–17.  
370 Atkinson, C.T., Gordeuk, V.R., Bayne, M.T., Aikawa, M., and Brittenham, G.M. (1991).

- 371 Stage-Specific Ultrastructural Effects of Desferrioxamine on Plasmodium Falciparum In  
372 Vitro. *Am. J. Trop. Med. Hyg.* *45*, 593–601.
- 373 Beemelmans, C., Guo, H., Rischer, M., and Poulsen, M. (2016). Natural products from  
374 microbes associated with insects. *Beilstein J. Org. Chem.* *12*, 314–327.
- 375 Beemelmans, C., Ramadhar, T.R., Kim, K.H., Klassen, J.L., Cao, S., Wyche, T.P., Hou,  
376 Y., Poulsen, M., Bugni, T.S., Currie, C.R., et al. (2017). Macrotermycins A–D,  
377 Glycosylated Macrolactams from a Termite-Associated *Amycolatopsis* sp. M39. *Org.*  
378 *Lett.* *19*, 1000–1003.
- 379 Blin, K., Wolf, T., Chevrette, M.G., Lu, X., Schwalen, C.J., Kautsar, S.A., Suarez Duran,  
380 H.G., de los Santos, E.L.C., Kim, H.U., Nave, M., et al. (2017). antiSMASH 4.0—  
381 improvements in chemistry prediction and gene cluster boundary identification. *Nucleic*  
382 *Acids Res.* *45*, W36–W41.
- 383 Böttcher, T., and Clardy, J. (2014). A Chimeric Siderophore Halts Swarming *Vibrio*.  
384 *Angew. Chemie Int. Ed.* *53*, 3510–3513.
- 385 Carr, G., Poulsen, M., Klassen, J.L., Hou, Y., Wyche, T.P., Bugni, T.S., Currie, C.R., and  
386 Clardy, J. (2012a). Microtermolides A and B from Termite-Associated *Streptomyces* sp.  
387 and Structural Revision of Vinylamycin. *Org. Lett.* *14*, 2822–2825.
- 388 Carr, G., Derbyshire, E.R., Caldera, E., Currie, C.R., and Clardy, J. (2012b). Antibiotic  
389 and Antimalarial Quinones from Fungus-Growing Ant-Associated *Pseudonocardia* sp. *J.*  
390 *Nat. Prod.* *75*, 1806–1809.
- 391 Cimermancic, P., Medema, M.H., Claesen, J., Kurita, K., Wieland Brown, L.C.,  
392 Mavrommatis, K., Pati, A., Godfrey, P.A., Koehrsen, M., Clardy, J., et al. (2014). Insights  
393 into Secondary Metabolism from a Global Analysis of Prokaryotic Biosynthetic Gene  
394 Clusters. *Cell* *158*, 412–421.
- 395 Cirimotich, C.M., Dong, Y., Clayton, A.M., Sandiford, S.L., Souza-Neto, J.A., Mulenga,  
396 M., and Dimopoulos, G. (2011). Natural Microbe-Mediated Refractoriness to  
397 Plasmodium Infection in Anopheles gambiae. *Science* *332*, 855–858.
- 398 Colin A. Smith, Elizabeth J. Want, Grace O'Maille, Ruben Abagyan, A., and Siuzdak, G.  
399 (2006). XCMS: Processing Mass Spectrometry Data for Metabolite Profiling Using  
400 Nonlinear Peak Alignment, Matching, and Identification.
- 401 Coon, K.L., Vogel, K.J., Brown, M.R., and Strand, M.R. (2014). Mosquitoes rely on their  
402 gut microbiota for development. *Mol. Ecol.* *23*, 2727–2739.
- 403 Coon, K.L., Brown, M.R., and Strand, M.R. (2016). Mosquitoes host communities of  
404 bacteria that are essential for development but vary greatly between local habitats. *Mol.*  
405 *Ecol.* *25*, 5806–5826.
- 406 Cox, C.D., Rinehart, K.L., Moore, M.L., and Cook, J.C. (1981). Pyochelin: novel structure  
407 of an iron-chelating growth promoter for *Pseudomonas aeruginosa*. *Proc. Natl. Acad.*  
408 *Sci.* *78*, 4256–4260.
- 409 Derbyshire, E.R., Prudêncio, M., Mota, M.M., and Clardy, J. (2012). Liver-stage malaria  
410 parasites vulnerable to diverse chemical scaffolds. *Proc. Natl. Acad. Sci.* *109*, 8511–  
411 8516.
- 412 Donia, M.S., Cimermancic, P., Schulze, C.J., Wieland Brown, L.C., Martin, J., Mitreva,  
413 M., Clardy, J., Lington, R.G., and Fischbach, M.A. (2014). A Systematic Analysis of  
414 Biosynthetic Gene Clusters in the Human Microbiome Reveals a Common Family of  
415 Antibiotics. *Cell* *158*, 1402–1414.
- 416 Duvall, L.B., Ramos-Espiritu, L., Barsoum, K.E., Glickman, J.F., and Vosshall, L.B.  
417 (2019). Small-Molecule Agonists of Ae. aegypti Neuropeptide Y Receptor Block  
418 Mosquito Biting. *Cell* *176*, 687–701.e5.
- 419 Edgar, R.C. (2004). MUSCLE: multiple sequence alignment with high accuracy and high  
420 throughput. *Nucleic Acids Res.* *32*, 1792–1797.
- 421 Ferrer, P., Vega-Rodriguez, J., Tripathi, A.K., Jacobs-Lorena, M., and Sullivan, D.J.

- 422 (2015). Antimalarial iron chelator FBS0701 blocks transmission by Plasmodium  
423 falciparum gametocyte activation inhibition. *Antimicrob. Agents Chemother.* 59, 1418–  
424 1426.
- 425 Fritsch, G., Treumer, J., Spira, D.T., and Jung, A. (1985). Plasmodium vinckei:  
426 Suppression of mouse infections with desferrioxamine B. *Exp. Parasitol.* 60, 171–174.
- 427 Ganley, J.G., Carr, G., Ioerger, T.R., Sacchettini, J.C., Clardy, J., and Derbyshire, E.R.  
428 (2018). Discovery of Antimicrobial Lipodepsipeptides Produced by a *Serratia* sp. within  
429 Mosquito Microbiomes. *ChemBioChem* 19, 1590–1594.
- 430 Ganley, J.G., D’Ambrosio, H.K., Shieh, M., and Derbyshire, E.R. (2020). Coculturing of  
431 Mosquito-Microbiome Bacteria Promotes Heme Degradation in *Elizabethkingia*  
432 *anophelis*. *ChemBioChem* cbic.201900675.
- 433 Haygood, M.G., Holt, P.D., and Butler, A. (1993). Aerobactin production by a planktonic  
434 marine Vibrio sp. *Limnol. Oceanogr.* 38, 1091–1097.
- 435 Helfrich, E.J.N., Vogel, C.M., Ueoka, R., Schäfer, M., Ryffel, F., Müller, D.B., Probst, S.,  
436 Kreuzer, M., Piel, J., and Vorholt, J.A. (2018). Bipartite interactions, antibiotic production  
437 and biosynthetic potential of the Arabidopsis leaf microbiome. *Nat. Microbiol.* 3, 909–  
438 919.
- 439 Hirschmann, M., Grundmann, F., and Bode, H.B. (2017). Identification and occurrence of  
440 the hydroxamate siderophores aerobactin, putrebactin, avaroferrin and ochrobactin C as  
441 virulence factors from entomopathogenic bacteria. *Environ. Microbiol.* 19, 4080–4090.
- 442 Jeffery, J.A.L., Thi Yen, N., Nam, V.S., Nghia, L.T., Hoffmann, A.A., Kay, B.H., and  
443 Ryan, P.A. (2009). Characterizing the Aedes aegypti Population in a Vietnamese Village  
444 in Preparation for a Wolbachia-Based Mosquito Control Strategy to Eliminate Dengue.  
445 *PLoS Negl. Trop. Dis.* 3, e552.
- 446 Johnstone, T.C., and Nolan, E.M. (2015). Beyond iron: non-classical biological functions  
447 of bacterial siderophores. *Dalt. Trans.* 44, 6320–6339.
- 448 Kajla, M.K. (2019). Symbiotic Bacteria as Potential Agents for Mosquito Control. *Trends*  
449 *Parasitol.* 36, 4–7.
- 450 Kato, N., Comer, E., Sakata-Kato, T., Sharma, A., Sharma, M., Maetani, M., Bastien, J.,  
451 Brancucci, N.M., Bittker, J.A., Corey, V., et al. (2016). Diversity-oriented synthesis yields  
452 novel multistage antimalarial inhibitors. *Nature* 538, 344–349.
- 453 Kroiss, J., Kaltenpoth, M., Schneider, B., Schwinger, M.-G., Hertweck, C., Maddula,  
454 R.K., Strohm, E., and Svatoš, A. (2010). Symbiotic streptomycetes provide antibiotic  
455 combination prophylaxis for wasp offspring. *Nat. Chem. Biol.* 6, 261–263.
- 456 Kukutla, P., Steritz, M., and Xu, J. (2013). Depletion of Ribosomal RNA for Mosquito Gut  
457 Metagenomic RNA-seq. *J. Vis. Exp.* 7, 50093.
- 458 Lankford, C.E., and Byers, B.R. (1973). Bacterial Assimilation of iron. *CRC Crit. Rev.*  
459 *Microbiol.* 2, 273–331.
- 460 Lovett, B., Bilgo, E., Millogo, S.A., Ouattarra, A.K., Sare, I., Gnambani, E.J., Dabire,  
461 R.K., Diabate, A., and St Leger, R.J. (2019). Transgenic Metarhizium rapidly kills  
462 mosquitoes in a malaria-endemic region of Burkina Faso. *Science* 364, 894–897.
- 463 Medema, M.H. (2018). Computational Genomics of Specialized Metabolism: from  
464 Natural Product Discovery to Microbiome Ecology. *MSystems* 3, e00182-17.
- 465 Medema, M.H., Kottmann, R., Yilmaz, P., Cummings, M., Biggins, J.B., Blin, K., de  
466 Bruijn, I., Chooi, Y.H., Claesen, J., Coates, R.C., et al. (2015). Minimum Information  
467 about a Biosynthetic Gene cluster. *Nat. Chem. Biol.* 11, 625–631.
- 468 Milshteyn, A., Colosimo, D.A., and Brady, S.F. (2018). Accessing Bioactive Natural  
469 Products from the Human Microbiome. *Cell Host Microbe* 23, 725–736.
- 470 Nollmann, F.I., Heinrich, A.K., Brachmann, A.O., Morisseau, C., Mukherjee, K.,  
471 Casanova-Torres, Á.M., Strobl, F., Kleinhans, D., Kinski, S., Schultz, K., et al. (2015). A  
472 *Photorhabdus* Natural Product Inhibits Insect Juvenile Hormone Epoxide Hydrolase.

- 473 ChemBioChem 16, 766–771.
- 474 Oh, D.-C., Poulsen, M., Currie, C.R., and Clardy, J. (2009). Dentigerumycin: a bacterial  
475 mediator of an ant-fungus symbiosis. *Nat. Chem. Biol.* 5, 391–393.
- 476 Radfar, A., Méndez, D., Moneriz, C., Linares, M., Marín-García, P., Puyet, A., Diez, A.,  
477 and Bautista, J.M. (2009). Synchronous culture of *Plasmodium falciparum* at high  
478 parasitemia levels. *Nat. Protoc.* 4, 1899–1915.
- 479 Ramirez, J.L., Short, S.M., Bahia, A.C., Saraiva, R.G., Dong, Y., Kang, S., Tripathi, A.,  
480 Mlambo, G., and Dimopoulos, G. (2014). *Chromobacterium Csp\_P* Reduces Malaria and  
481 Dengue Infection in Vector Mosquitoes and Has Entomopathogenic and In Vitro Anti-  
482 pathogen Activities. *PLoS Pathog.* 10, e1004398.
- 483 Raphemot, R., Eubanks, A.L., Toro-Moreno, M., Geiger, R.A., Hughes, P.F., Lu, K.-Y.,  
484 Haystead, T.A.J., and Derbyshire, E.R. (2019). *Plasmodium* PK9 Inhibitors Promote  
485 Growth of Liver-Stage Parasites. *Cell Chem. Biol.* 26, 411–419.e7.
- 486 Ravel, J., and Cornelis, P. (2003). Genomics of pyoverdine-mediated iron uptake in  
487 pseudomonads. *Trends Microbiol.* 11, 195–200.
- 488 Reimer, D., Cowles, K.N., Proschak, A., Nollmann, F.I., Dowling, A.J., Kaiser, M.,  
489 Constant, R., ffrench-, Goodrich-Blair, H., and Bode, H.B. (2013). Rhabdopeptides as  
490 Insect-Specific Virulence Factors from Entomopathogenic Bacteria. *ChemBioChem* 14,  
491 1991–1997.
- 492 Rütshlin, S., Gunesch, S., and Böttcher, T. (2017). One Enzyme, Three Metabolites:  
493 *Shewanella algae* Controls Siderophore Production via the Cellular Substrate Pool. *Cell*  
494 *Chem. Biol.* 24, 598–604.e10.
- 495 Saraiva, R.G., Huitt-Roehl, C.R., Tripathi, A., Cheng, Y.-Q., Bosch, J., Townsend, C.A.,  
496 and Dimopoulos, G. (2018). *Chromobacterium* spp. mediate their anti-*Plasmodium*  
497 activity through secretion of the histone deacetylase inhibitor romidepsin. *Sci. Rep.* 8,  
498 6176.
- 499 Schwyn, B., and Neilands, J.B. (1987). Universal chemical assay for the detection and  
500 determination of siderophores. *Anal. Biochem.* 160, 47–56.
- 501 Seyedsayamdost, M.R., Cleto, S., Carr, G., Vlamakis, H., Jo?o Vieira, M., Kolter, R., and  
502 Clardy, J. (2012). Mixing and Matching Siderophore Clusters: Structure and Biosynthesis  
503 of *Serratia* Siderophores. *J. Am. Chem. Soc.* 134, 13550–13553.
- 504 Shane, J.L., Grogan, C.L., Cwalina, C., and Lampe, D.J. (2018). Blood meal-induced  
505 inhibition of vector-borne disease by transgenic microbiota. *Nat. Commun.* 9, 4127.
- 506 Shanzer, A., Libman, J., Lytton, S.D., Glickstein, H., and Cabantchik, Z.I. (1991).  
507 Reversed siderophores act as antimalarial agents. *Proc. Natl. Acad. Sci. U. S. A.* 88,  
508 6585–6589.
- 509 Stathopoulos, S., Neafsey, D.E., Lawniczak, M.K.N., Muskavitch, M.A.T., and  
510 Christophides, G.K. (2014). Genetic Dissection of *Anopheles gambiae* Gut Epithelial  
511 Responses to *Serratia marcescens*. *PLoS Pathog.* 10, e1003897.
- 512 Takahashi, A., Nakamura, H., Kameyama, T., Kurasawa, S., Naganawa, H., Okami, Y.,  
513 Takeuchi, T., Umezawa, H., and Iitaka, Y. (1987). Bisucaberin, a new siderophore,  
514 sensitizing tumor cells to macrophage-mediated cytotoxicity. II. Physico-chemical  
515 properties and structure determination. *J. Antibiot. (Tokyo)*. 40, 1671–1676.
- 516 Tamura, K., Peterson, D., Peterson, N., Stecher, G., Nei, M., and Kumar, S. (2011).  
517 MEGA5: Molecular Evolutionary Genetics Analysis Using Maximum Likelihood,  
518 Evolutionary Distance, and Maximum Parsimony Methods. *Mol. Biol. Evol.* 28, 2731–  
519 2739.
- 520 Wang, S., Dos-Santos, A.L.A., Huang, W., Liu, K.C., Oshaghi, M.A., Wei, G., Agre, P.,  
521 and Jacobs-Lorena, M. (2017). Driving mosquito refractoriness to *Plasmodium*  
522 *falciparum* with engineered symbiotic bacteria. *Science* 357, 1399–1402.
- 523 Wang, Y., Gilbreath, T.M., Kukutla, P., Yan, G., and Xu, J. (2011). Dynamic Gut



524 Microbiome across Life History of the Malaria Mosquito *Anopheles gambiae* in Kenya.  
 525 PLoS One 6, e24767.  
 526 Winkelmann, G., Schmid, D.G., Nicholson, G., Jung, G., and Colquhoun, D.J. (2002).  
 527 Bisucaberin – A dihydroxamate siderophore isolated from *Vibrio salmonicida*, an  
 528 important pathogen of farmed Atlantic salmon (*Salmo salar*). *BioMetals* 15, 153–160.  
 529 (2016). WHO | Vector-borne diseases (World Health Organization).  
 530  
 531

532 **Main Text Figures.**

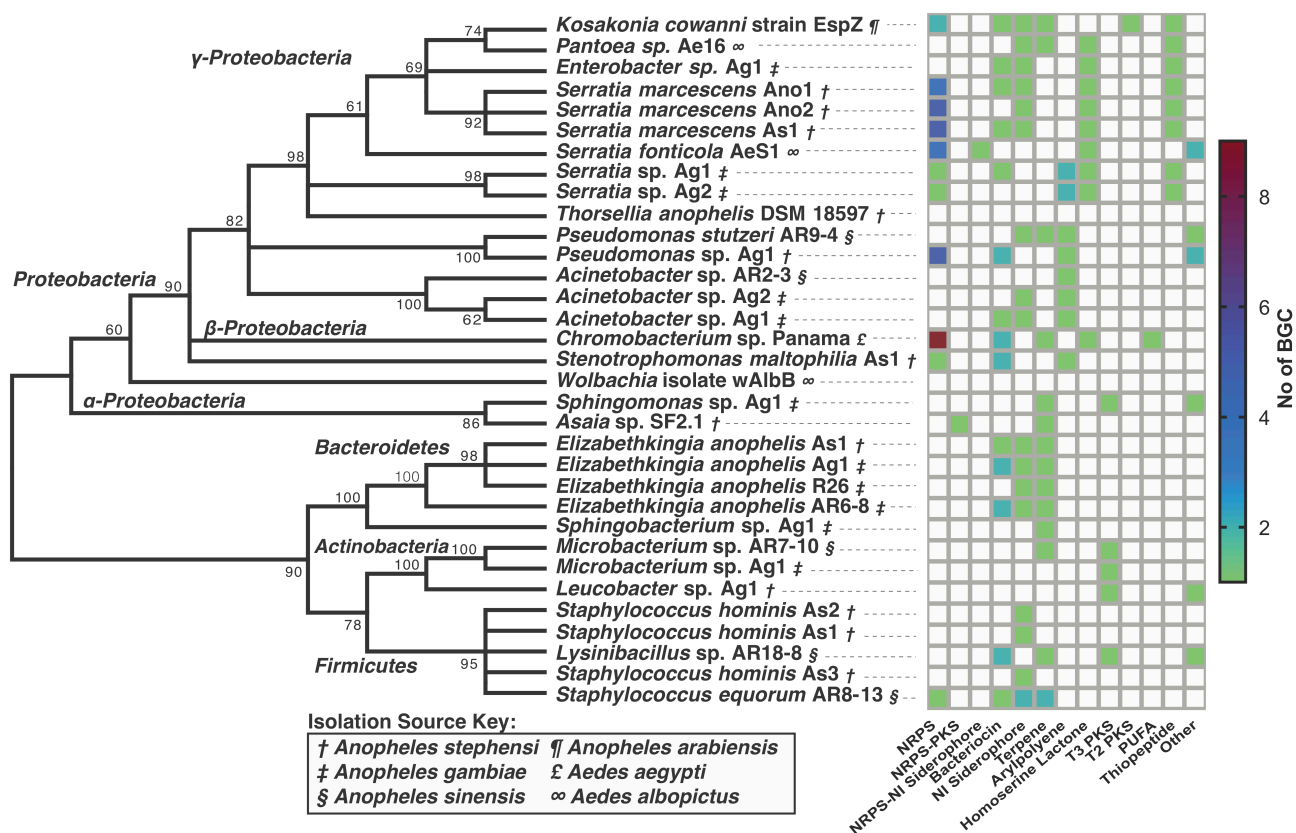

533

534 **Figure 1. Summary of the Mosquito-Microbiome Strains Examined and their**  
 535 **Biosynthetic Potentials.**

536

537 Maximum likelihood phylogenetic tree of 16S rRNA of all 33 strains examined in this study  
 538 and their biosynthetic potential. The heat map to the right of the phylogenetic tree indicates  
 539 the number of each type of BGC identified by antiSMASH for each strain. White boxes  
 540 indicate zero BGCs from that class were found within the genome. Symbols next to each  
 541 strain name indicate the original mosquito isolation source (Isolation Source Key).

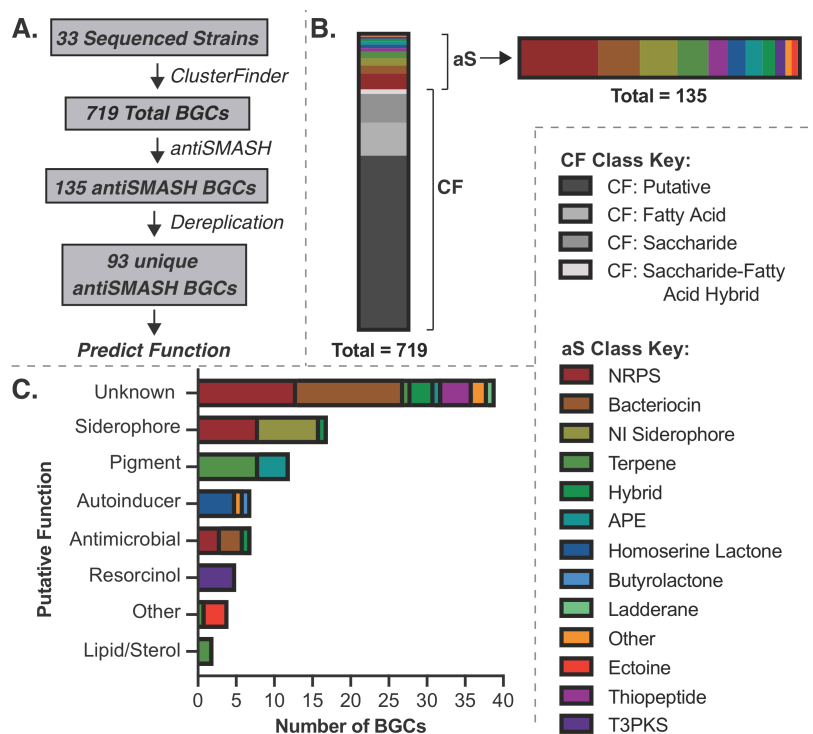

542

543 **Figure 2. A Summary of the BGCs from Mosquito-Microbiomes and Predicted**  
 544 **Bioactivities.**

545

546 (A) Overview of the bioinformatic analysis. (B) Summation of all BGCs indicating the  
 547 amounts of antiSMASH (aS) and ClusterFinder (CF) BGCs and the type of each cluster  
 548 with colors distinguishing the different classification. (C) Bar chart indicating the predicted  
 549 function of the 93 unique antiSMASH clusters with colors distinguishing the antiSMASH  
 550 classification.

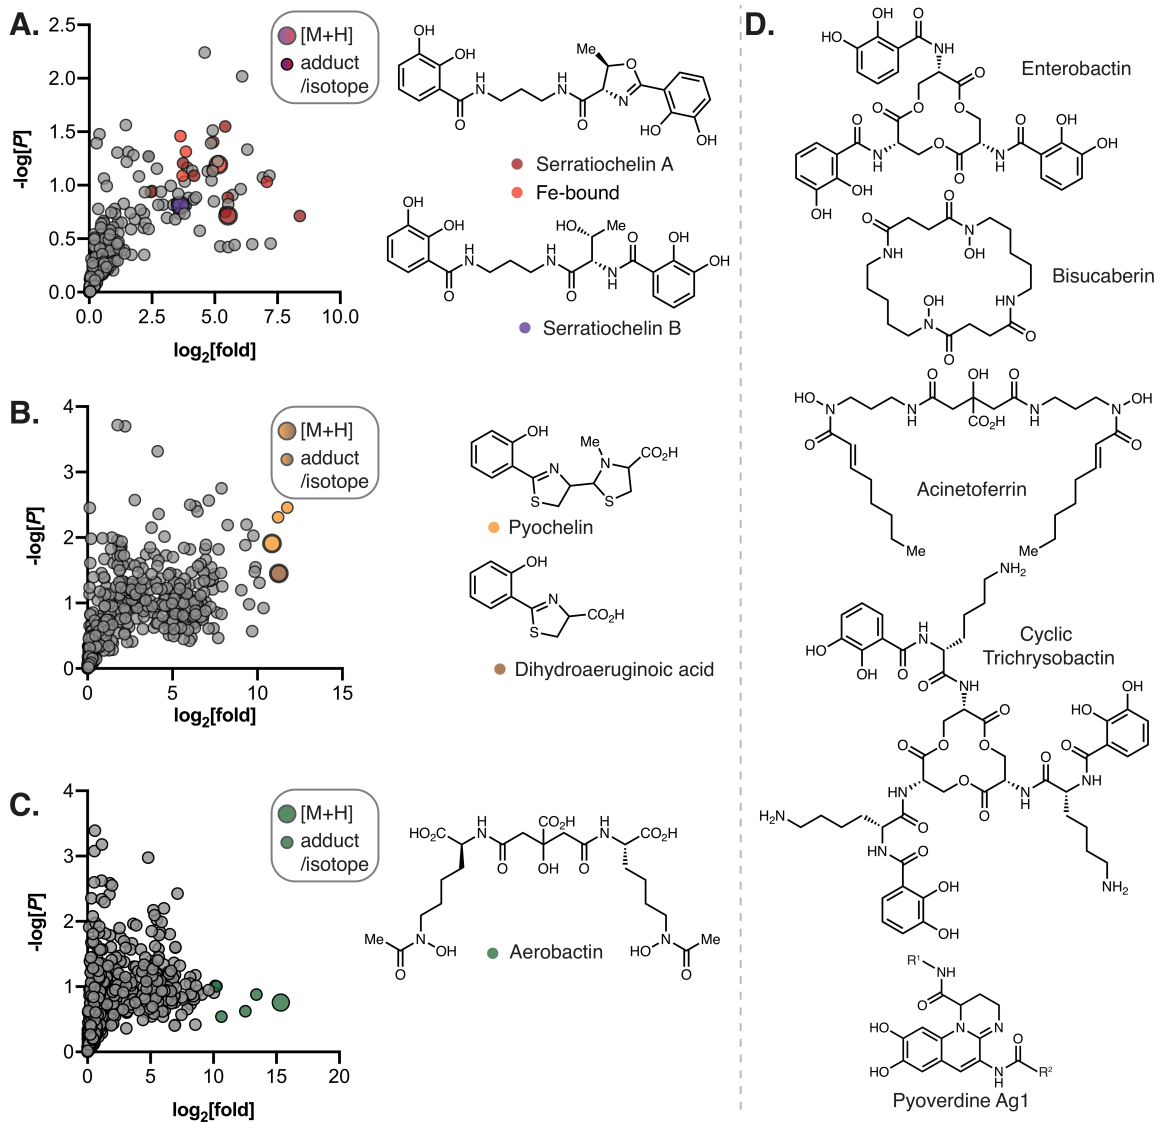

551

552 **Figure 3. Overview of the Siderophores Identified in this Study, Including**  
 553 **Differential Metabolomics Results from Three Bacterial Strains Analyzed.**

554

555 (A) Volcano plot of upregulated ions of *Serratia* sp. grown in iron-deficient media. (B)

556 Volcano plot of upregulated ions of *Pseudomonas* sp. Ag1 grown in iron-deficient media.

557 (C) Volcano plot of upregulated ions of *Enterobacter* sp. Ag1 grown in iron-deficient media.

558 (D) Structures of other siderophores identified in this study. All stereochemistry is  
 559 predicted based on previously published structures and biosynthetic predictions.

560



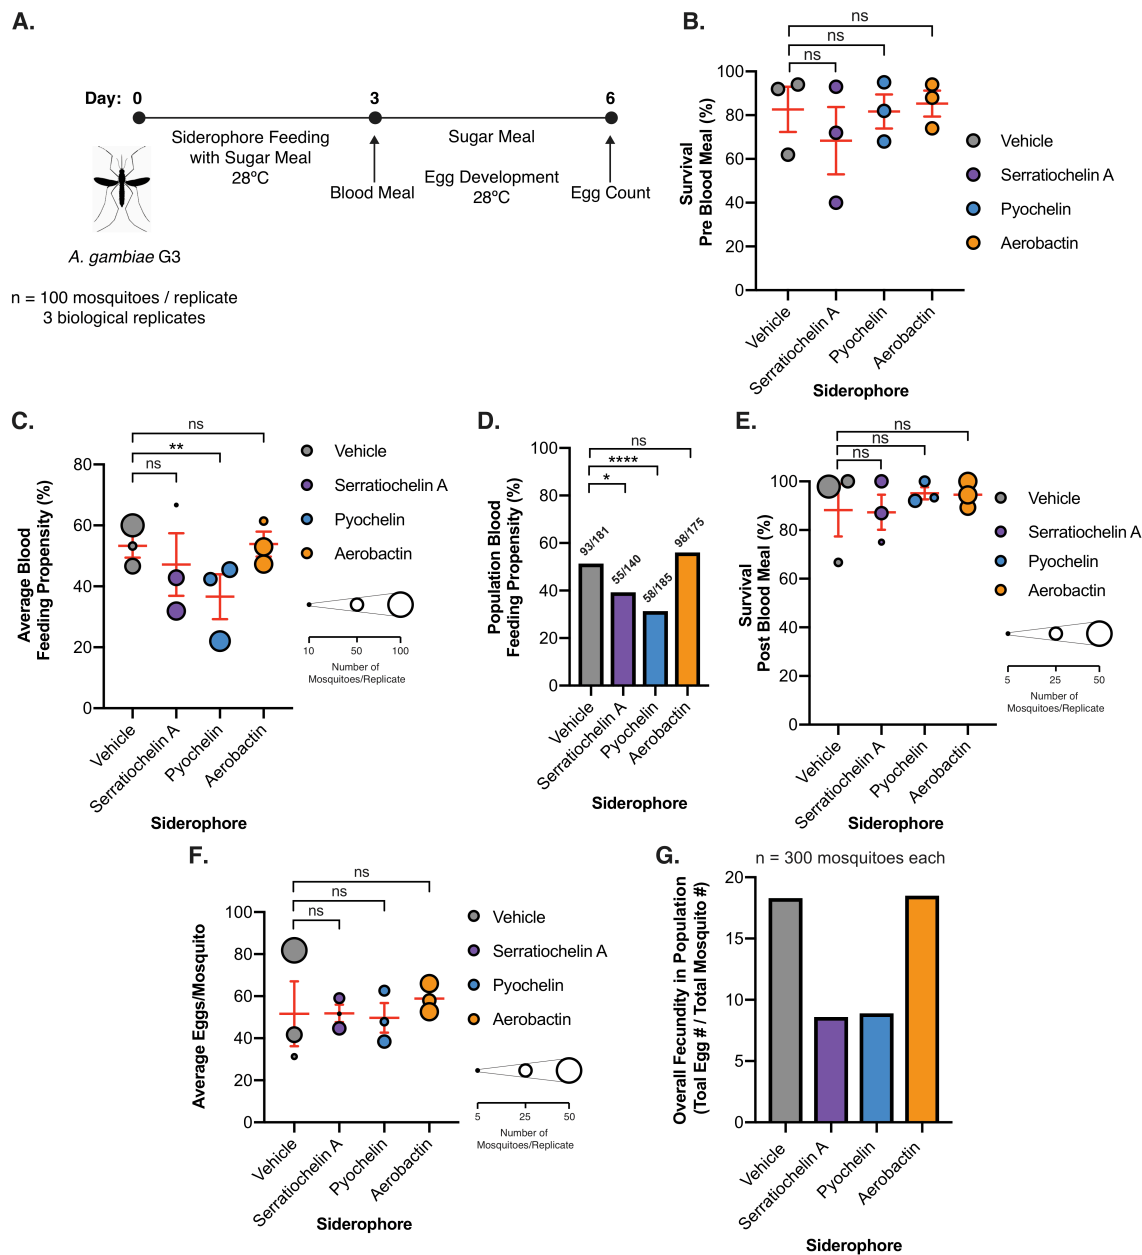

561

562 **Figure 4. Evaluation of Mosquito-Microbiome Siderophore Activity Against *A.***  
 563 ***gambiae* Survival, Blood Feeding, and Fecundity.**

564  
 565 (A) Overview of mosquito survival and fecundity assays. For each experiment, 100 female  
 566 mosquitoes were used, and three biological replicates were completed. (B) Average  
 567 survival of female mosquitoes (at t = 3 days) supplemented with siderophores (100 μM)  
 568 pre-blood meal. Each dot represents a biological replicate (n = 100). The red bars  
 569 represent the mean ± SEM of the three biological replicates (Two-way ANOVA multiple  
 570 comparisons analysis, ns = not significant). (C) Average blood feeding propensity for  
 571 female mosquitoes post-siderophore feeding. Each dot represents a biological replicate  
 572 and the size of each dot represents the number of mosquitoes exposed to a blood meal.  
 573 The red bars represent the mean ± SEM of the three biological replicates (Two-way  
 574 ANOVA multiple comparisons analysis, \*\* P < 0.01). (D) Total blood feeding propensity at

575 the population level. Each bar represents pooled data for the three biological replicates.  
576 The fractions above each bar represent (mosquitoes fed/mosquitoes exposed to a blood  
577 meal), (unpaired t-test, \*  $P < 0.05$ , \*\*\*\*  $P < 0.0001$ ). **(E)** Average survival of female  
578 mosquitoes (from  $t = 4-6$  days) post-blood meal. Each dot represents a biological replicate  
579 and the size of each dot represents the number of mosquitoes exposed that took a blood  
580 meal (Two-way ANOVA multiple comparisons analysis). **(F)** Average number of eggs laid  
581 per blood-fed female mosquito. Each dot represents a biological replicate and the size of  
582 each dot represents the number of blood fed mosquitoes analyzed (Two-way ANOVA,  
583 multiple comparisons analysis). **(G)** Overall fecundity of female mosquitoes at the  
584 population level when supplemented with various siderophores for 3 days. In total, 300  
585 mosquitoes (3 biological replicates at 100 female mosquitoes each) were supplemented  
586 with a vehicle control or a siderophore. Serratiochelin A and pyochelin reduced the overall  
587 fecundity by over 50% due to a combination of toxicity and lowered blood feeding  
588 propensity.  
589

590

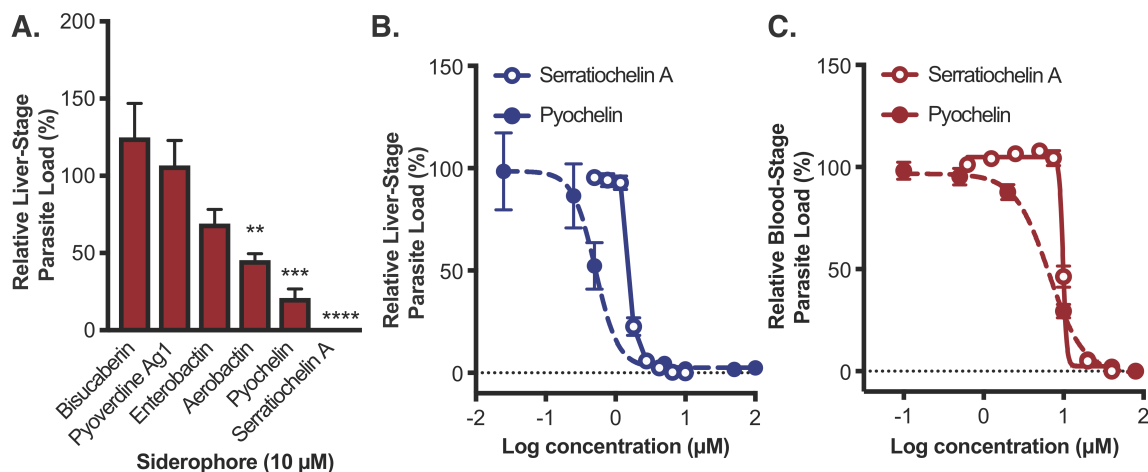

591

592 **Figure 5. *In vitro* Evaluation of Mosquito-Microbiome Siderophores for Anti-**  
593 ***Plasmodium* Activity.**

594

595 (A) Activity of siderophores at 10 µM against *P. berghei* ANKA infection of human HuH7  
596 hepatocytes (One-way ANOVA, Dunnett's multiple test comparison, \*\*  $P < 0.01$ , \*\*\*  $P <$   
597  $0.001$ , \*\*\*\*  $P < 0.0001$ ). (B) Inhibition of *P. berghei* ANKA parasite load in human HuH7  
598 hepatocytes by serratiochelin A (solid line, open circles) and pyochelin (dotted line, filled  
599 circles), with EC<sub>50</sub> values of 1.6 µM and 510 nM, respectively. (C) Inhibition of *P.*  
600 *falciparum* 3D7 parasite load in human red blood cells by serratiochelin A (solid line, open  
601 circles) and pyochelin (dotted line, filled circles), with EC<sub>50</sub> values of 10 and 6.6 µM,  
602 respectively.

603

604 **Materials & Methods**

605 **RESOURCE TABLE**

| REAGENT or RESOURCE                                                   | SOURCE                               | IDENTIFIER                                                                                                                                                                            |
|-----------------------------------------------------------------------|--------------------------------------|---------------------------------------------------------------------------------------------------------------------------------------------------------------------------------------|
| <b>Biological Samples</b>                                             |                                      |                                                                                                                                                                                       |
| Human Blood                                                           | Gulf Coast Regional Blood Center     | N/A                                                                                                                                                                                   |
| <i>P. falciparum</i> 3D7                                              | BEI Resources Repository             | NIAID, NIH, MRA-102                                                                                                                                                                   |
| <i>P. berghei</i> ANKA infected <i>Anopheles stephensi</i> mosquitoes | NYU Langone Medical Center Insectary | N/A                                                                                                                                                                                   |
| <i>Anopheles gambiae</i> G3 mosquitoes                                | BEI Resources Repository             | NIAID, NIH, MRA-132K                                                                                                                                                                  |
| <i>Enterobacter</i> sp. Ag1                                           | BEI Resources Repository             | NIAID, NIH, NR-50125                                                                                                                                                                  |
| <i>Serratia</i> sp. Ag2                                               | BEI Resources Repository             | NIAID, NIH, NR-50123                                                                                                                                                                  |
| <i>Serratia</i> sp.                                                   | (Ganley et al., 2018)                | N/A                                                                                                                                                                                   |
| <i>Pseudomonas</i> sp. Ag1                                            | BEI Resources Repository             | NIAID, NIH, NR-50126                                                                                                                                                                  |
| <i>Acinetobacter</i> sp. Ag1                                          | BEI Resources Repository             | NIAID, NIH, NR-50121                                                                                                                                                                  |
| <i>Elizabethkingia anophelis</i> Ag1                                  | BEI Resources Repository             | NIAID, NIH, NR-50124                                                                                                                                                                  |
| <b>Chemicals, Peptides, and Recombinant Proteins</b>                  |                                      |                                                                                                                                                                                       |
| Serratiochelin A                                                      | This Paper                           | N/A                                                                                                                                                                                   |
| Aerobactin                                                            | This Paper                           | N/A                                                                                                                                                                                   |
| Pyoverdine Ag1                                                        | This Paper                           | N/A                                                                                                                                                                                   |
| Bisucaberin                                                           | (Rütschlin et al., 2017)             | N/A                                                                                                                                                                                   |
| Pyochelin I & II                                                      | Toronto Research Chemicals           | Cat# P840365                                                                                                                                                                          |
| Enterobactin                                                          | Millipore Sigma                      | Cat# E3910                                                                                                                                                                            |
| <b>Critical Commercial Assays</b>                                     |                                      |                                                                                                                                                                                       |
| Bright-Glo Luciferase Assay System                                    | Promega                              | Cat# G6081                                                                                                                                                                            |
| CellTiter-Fluor Cell Viability Assay                                  | Promega                              | Cat# E2620                                                                                                                                                                            |
| <b>Experimental Models: Cell Lines</b>                                |                                      |                                                                                                                                                                                       |
| Human: HuH7 cells                                                     | Laboratory of Peter Sorger           | N/A                                                                                                                                                                                   |
| <b>Experimental Models: Organisms/Strains</b>                         |                                      |                                                                                                                                                                                       |
| <i>P. berghei</i> -Luc; Strain background: ANKA                       | NYU Insectary                        | N/A                                                                                                                                                                                   |
| <b>Software and Algorithms</b>                                        |                                      |                                                                                                                                                                                       |
| GraphPad Prism 7                                                      | GraphPad Software                    | graphpad.com                                                                                                                                                                          |
| antiSMASH 4.0                                                         | (Blin et al., 2017)                  | <a href="https://antismash.secondarymetabolites.org/#!/start">https://antismash.secondarymetabolites.org/#!/start</a>                                                                 |
| XCMS Online                                                           | (Colin A. Smith et al., 2006)        | <a href="https://xcmsonline.scripps.edu/landing_page.php?pgcontent=mainPage">https://xcmsonline.scripps.edu/landing_page.php?pgcontent=mainPage</a>                                   |
| MassHunter Qualitative Analysis                                       | Agilent Software                     | <a href="https://www.agilent.com/en/products/software-informatics/mass-spectrometry-software">https://www.agilent.com/en/products/software-informatics/mass-spectrometry-software</a> |
| MUSCLE                                                                | (Edgar, 2004)                        | <a href="http://www.drive5.com/muscle/">http://www.drive5.com/muscle/</a>                                                                                                             |
| MEGA                                                                  | (Tamura et al., 2011)                | <a href="https://www.megasoftware.net/">https://www.megasoftware.net/</a>                                                                                                             |

606

607 **CONTACT FOR REAGENT AND RESOURCE SHARING**

608 Further information and requests for resources and reagents should be directed to and

609 will be fulfilled by the Lead Contact, Emily Derbyshire ([emily.derbyshire@duke.edu](mailto:emily.derbyshire@duke.edu)).

610

611 **EXPERIMENTAL MODEL AND SUBJECT DETAIL**

612 Parasite strains

613 *Plasmodium berghei* ANKA strains (*P. berghei*-Luc) were freshly harvested from dissected  
614 salivary glands prior to experiments from infected *Anopheles stephensi* mosquitoes  
615 purchased from the New York University Langone Medical Center Insectary. Blood-stage  
616 parasites, *P. falciparum* 3D7 strain, were acquired from BEI Resources Repository (NIAID,  
617 NIH, MRA-102, contributed by Daniel J. Carucci).

618

#### 619 Cell lines

620 HuH7 cells (gift from Dr. Peter Sorger) were cultured and maintained in Dulbecco's  
621 Modified Eagle Medium (DMEM) supplemented with L-glutamine (Gibco), 10 % heat-  
622 inactivated fetal bovine serum (HI-FBS) (v/v) (Sigma-Aldrich), and 1 % antibiotic-  
623 antimycotic (Thermo Fisher Scientific) in a standard tissue culture incubator at 37°C and  
624 5 % CO<sub>2</sub>.

625

#### 626 **METHOD DETAILS**

##### 627 General experimental procedures

628 An Agilent 1200 Series ChemStation Preparative HPLC system equipped with a diode  
629 array and a SUPELCO® SUPELCOSIL™LC-18 column (5 µm, 250 x 21.2 mm) was used  
630 for the preparative purification of serratiochelin A, aerobactin, and pyoverdine Ag1. HPLC  
631 was monitored at 254 nm for the purification of compounds, unless otherwise stated. For  
632 all metabolomic studies, LCMS-ESI was conducted on an Agilent 6224 LC/MS-TOF (high  
633 resolution) system equipped with a diode array and an Agilent ZORBAX SB-C18 (5 µm,  
634 2.1 x 50 mm) column. For MS/MS, an Agilent 6460 Triple Quadrupole LC-MS was used.

635

##### 636 Bacterial strains and media

637 The bacterial strains used in this study are given in **Data Set S1E**. Bacteria were grown in  
638 liquid Luria Bertani (LB) medium or solid bacteriological medium with 25 g L<sup>-1</sup> (pH 7) and

639 Difco Bacto agar at 15 g L<sup>-1</sup> (pH 7) at 30°C, unless otherwise stated. To prepare metal  
640 deficient LB broth, 0.5 g L<sup>-1</sup> of Chelex® 100 sodium form (Sigma-Aldrich) was added and  
641 shaken at 250 rpm at 5°C for 2 hours, followed by filtering of the resin and subsequent  
642 pressure sterilization. For cultures grown in M9 minimal media, 0.4 % glucose was used  
643 as a carbon source.

644

#### 645 Generation of phylogenetic tree of bacteria isolated from mosquito microbiomes

646 16S sequences of the 33 bacterial species previously isolated from mosquito microbiomes  
647 were analyzed. Sequences were aligned using MUSCLE (Edgar, 2004) alignment in  
648 MEGA (Tamura et al., 2011) to construct a maximum likelihood tree with 100 bootstrap  
649 replicates using Nearest-Neighbor-Interchange (NNI) heuristic and Tamura-Nei method.

650

#### 651 Computational analysis of bacterial BGCs from mosquito microbiomes

652 Genome sequences of bacteria originally isolated from bacteria were compiled from NCBI  
653 and were subject to analysis by ClusterFinder with a minimum of 5 coding sequences  
654 (CDSs) and 5 biosynthesis-related PFAM domains per cluster and a ClusterFinder  
655 probability of 60 %. The genomes were additionally subject to antiSMASH 4.0 to detect  
656 BGCs in known classes. The accession numbers, nucleotide numbers, and probability  
657 score for each cluster is included in **Data Set S1B**.

658

#### 659 Prediction of biological function of metabolites from corresponding BGC and dereplication 660 of clusters

661 To generate predictions of biological functions of metabolites corresponding to each  
662 antiSMASH cluster, each cluster was compared to previously characterized clusters. As  
663 an initial search within the antiSMASH program, investigation of homologous known gene  
664 clusters was utilized to identify similar clusters that are already deposited within the

665 Minimum Information about a Biosynthetic Gene Cluster (MIBiG) repository (Medema et  
666 al., 2015). Clusters with genes with similarity to over 50 % of MIBiG standard clusters were  
667 further analyzed. Specifically, biosynthetic CDSs from the query clusters were analyzed  
668 against the MIBiG cluster CDSs via protein BLAST (Altschul et al., 1997) to assign putative  
669 CDS functions. Query clusters that did not have clear matches for MIBiG reference  
670 clusters were analyzed through BLASTp and subsequent literature searches. Specifically,  
671 core biosynthetic CDSs were analyzed by BLASTp to find the closest related  
672 characterized enzymes/BGCs that are not deposited within the MIBiG repository. For non-  
673 modular BGCs (all except for type I PKS & NRPS BGCs), matching homologs from  
674 previously characterized clusters to all core biosynthetic genes of the mosquito clusters  
675 (excluding building block genes and accessory genes) was necessary to assign a putative  
676 function assignment. Variation in additional non-core biosynthetic genes was allowed. For  
677 modular-based BGCs, like type I PKS and NRPS, domain architecture was analyzed.  
678 Conservation in overall domain architecture and all core biosynthetic genes was  
679 necessary for putative function prediction assignment, with the exception of truncated  
680 contigs (See Clusters Serratia70, Serratia99, Serratia130 & Serratia151 in **Data Set S2**).  
681 Slight variations in monomer incorporations for acyltransferase (for PKS BGCs) and  
682 adenylation (for NRPS BGCs) were tolerated, as well as additional epimerase domains  
683 within NRPS BGCs. The structure of the molecules from clusters Chromobacterium4 and  
684 Chromobacterium6 were previously investigated (Saraiva et al., 2018), therefore no  
685 phylogenetic analysis was conducted for these two gene clusters and predicted functions  
686 were based off of the corresponding metabolites. Summary of predicted functions are  
687 found in **Data Set S1C**. Detailed bioinformatic analysis to predict functions are found in  
688 **Data Set S2**.

689 In an attempt to understand the chemical diversity of molecules produced by BGCs  
690 detected by antiSMASH, highly similar biosynthetic gene clusters were dereplicated. To

691 meet this criterion, all biosynthetic genes need to be conserved across the two clusters  
692 with over 85 % protein coverage and over 50 % protein identity of each CDS. For modular  
693 BGCs, predictions of monomer incorporations additionally need to be conserved in order  
694 to be considered a replicate. Nearly all replicate BGCs were found in bacteria within the  
695 same genus. It is important to note that some BGCs exist on separate genetic loci and  
696 function together to produce metabolites, as seen in pyoverdine biosynthesis (Ravel and  
697 Cornelis, 2003), or may be interrupted at the end of contig sequences; thus, the predicted  
698 total number of BGCs may overestimate the actual BGCs. In instances of disparate  
699 predicted BGCs that are well-established to work together or could be identified on  
700 separate contigs, these BGCs were counted as one in the total dereplicated BGCs  
701 (*Pseudomonas*10 + *Pseudomonas*24 and *Pseudomonas*1 + *Pseudomonas*5). Replicate  
702 BGCs are summarized in **Data Set S1D**.

703

#### 704 Optimization of siderophore production and detection in mosquito microbiome species

705 In order to conduct differential metabolomics to identify siderophore products, two  
706 culturing conditions for each strain were optimized. The first condition had zero to little  
707 siderophore production, while the second successfully produced siderophore product(s).  
708 To monitor siderophore production, supernatant aliquots were taken at various time points  
709 during growth and tested via the liquid chromo azurolsulfonate (CAS) colorimetric assay  
710 (Schwyn and Neilands, 1987). The following strains were able to grow well in M9 minimal  
711 media: *Serratia* sp., *Enterobacter* sp. Ag1, and *Pseudomonas* sp. Ag1. For each of these  
712 strains, growth overnight at 30°C in M9 minimal media without additional supplementation  
713 of iron, resulted in CAS assays color change indicating siderophore production. With the  
714 supplementation of FeCl<sub>3</sub> at 1 mM, siderophore production was halted or significantly  
715 decreased as indicated by the CAS assay. For *Serratia* sp. Ag2, growth in metal deficient  
716 LB broth for 3–4 days resulted in production of enterobactin. *E. anophelis* Ag1 produced



717 the greatest quantities of bisucaberin when grown in metal deficient media with peptone  
718 (1.0 wt %), yeast extract (0.5 wt %), glucose (0.4 wt %), Na<sub>2</sub>HPO<sub>4</sub> (6.7 g/L), KH<sub>2</sub>PO<sub>4</sub> (3  
719 g/L), NH<sub>4</sub>Cl (1.67 g/L), NaCl (0.5 g/L), MgSO<sub>4</sub> (200 mM), Ca<sub>2</sub>Cl (100 mM). *Acinetobacter*  
720 sp. Ag1 did not grow in metal deficient media, however acinetoferrin was still produced in  
721 normal LB liquid media.

722

### 723 Extraction and LCMS-ESI analysis of mosquito microbiome metabolites

724 All bacterial species were streaked out on LB agar and growth overnight at 30°C. Colonies  
725 were subsequently picked and grown in 5 mL of various optimized iron-deficient or iron-  
726 supplemented media for various times at 30°C at 250 rpm. For each sample, 3 biological  
727 replicates were used. After growth, cultures were pelleted, and the supernatants were  
728 freeze-dried. The lyophilized supernatants were dissolved in 3 mL of MeOH and vortexed  
729 (2 x 0.5 minute), pelleted, and the MeOH layer was dried *in vacuo*. The MeOH extracts  
730 were reconstituted in 150 µL of 50:50 H<sub>2</sub>O:MeCN and filtered. The resulting solution was  
731 diluted 1:10 in MeCN and used for metabolomic studies.

732

### 733 Differential metabolomics of microbiome species with various levels of iron

734 Samples were analyzed by reversed-phase chromatography on an Agilent 6224 LCMS-  
735 TOF using an Agilent ZORBAX SB-C18 (5 µm, 2.1 x 50 mm) column. For each sample,  
736 the following mobile phases were used: 98:2 (v:v) H<sub>2</sub>O:MeCN with 0.3 % formic acid (A)  
737 and 98:2 (v:v) MeCN:H<sub>2</sub>O with 0.3 % formic acid (B) with a flow rate of 0.350 mL min<sup>-1</sup>,  
738 with the following method: 0–5 minutes, isocratic 100 % A; 5–20 minutes, linear gradient  
739 from 0–100 % B; 20–30 minutes, isocratic 100 % B; 30–32 minutes, linear gradient from  
740 0–100 % A; from 32–40 minutes, isocratic 100 % A. All MS data was collected in positive  
741 ion mode under the following parameters: mass range: 100-1100 m/z; drying gas: 325°C,  
742 11 L/min; nebulizer: 33 psig; capillary: 3500 V; fragmentor: 175 V; skimmer: 65 V; OCT 1

743 RF Vpp: 750 V; 1000 ms per spectrum. The initial MS data were analyzed by MassHunter  
744 Qualitative Analysis software (Agilent). Subsequent differential metabolomic analysis was  
745 carried out with XCMS using pairwise analysis comparing the iron-deficient runs against  
746 the iron-supplemented runs with three biological replicates of each (Colin A. Smith et al.,  
747 2006). Data from each analysis is included in **Data Set S3**, which includes a list of mass  
748 peaks ( $m/z$  values), retention times, peak intensities, fold change,  $\log_2$ [fold change],  $P$   
749 values (two-tailed unequal Student's  $t$ -test), and  $-\log[P]$  values. To visualize volcano plots,  
750  $\log_2$ [fold change] was plotted against  $-\log[P]$  in GraphPad Prism.

751

#### 752 Production and isolation of serratiochelin A, aerobactin, and pyoverdine Ag1

753 **Serratiochelin A** – Serratiochelin A was isolated as previously described  
754 (Seyedsayamdost et al., 2012) with slight modifications. Briefly, *Serratia* sp. was streaked  
755 out on LB agar grown overnight and then picked and grown in 5 mL of M9 minimal media  
756 and grown at 30°C at 250 rpm overnight. The overnight culture was used to inoculate four  
757 4 L unbaffled Fernbach flasks each with 1 L of M9 minimal media. The cultures were grown  
758 at 30°C/250 rpm for 4 days. The resulting culture was spun down and the supernatants  
759 were extracted with EtOAc (1 L per flask) and washed with brine, dried over  $\text{Na}_2\text{SO}_4$ , and  
760 concentrated *in vacuo*. The crude extract was reconstituted in 5 mL of MeCN and  
761 fractionated by preparative reversed-phased HPLC using the following gradient,  
762 monitoring at 254 nm: 0–10 minutes, isocratic 100%  $\text{H}_2\text{O}$ ; 10–15 minutes, linear gradient  
763 from 0% MeCN to 30% MeCN; 15–40 minutes, linear gradient from 30% MeCN to 60%  
764 MeCN; 40–50 minutes, linear gradient from 60% MeCN to 100% MeCN; 50–55 minutes,  
765 isocratic 100% MeCN. Since serratiochelin A is labile to acid hydrolysis, the HPLC  
766 solvents were not acidified. Fractions were analyzed by HR-ESI and fractions solely  
767 containing the serratiochelin A mass were pooled, concentrated, and lyophilized to afford  
768 purified serratiochelin A (5–10 mg).

769 ***Aerobactin*** – Aerobactin was purified via a modified protocol from Holt & Butler (Haygood  
770 et al., 1993). Briefly, *Enterobacter* sp. Ag1 was streaked out on LB agar grown overnight  
771 and then picked and grown in 5 mL of M9 minimal media and grown at 30°C at 250 rpm  
772 overnight. The overnight culture was used to inoculate four 4 L unbaffled Fernbach flasks  
773 each with 1 L of M9 minimal media. The cultures were grown at 30°C at 250 rpm for 4  
774 days. The resulting culture was pelleted, and the supernatants were collected. To the  
775 supernatants 20 g L<sup>-1</sup> of Dowex® 1X8 chloride form (100–200 mesh, Sigma-Aldrich) resin  
776 was added and shaken at 250 rpm at 5°C for 24 hours. The resin-slurry was applied to a  
777 gravity column and washed with ultrapure H<sub>2</sub>O (3 x 250 mL). The siderophore was eluted  
778 with 50 % MeOH:water and fractions containing siderophore activity via the CAS assay  
779 were pooled, concentrated, and lyophilized. The resulting freeze-dried pellet was  
780 reconstituted in 10 mL of MeOH and fractionated by preparative reversed-phase HPLC  
781 using the following gradient, monitoring at 220 nm: 0–10 minutes, isocratic 100% H<sub>2</sub>O;  
782 10–15 minutes, linear gradient from 0% MeCN to 30% MeCN; 15–40 minutes, linear  
783 gradient from 30% MeCN to 60% MeCN; 40–50 minutes, linear gradient from 60% MeCN  
784 to 100% MeCN; 50–55 minutes, isocratic 100% MeCN. Both HPLC solvents were acidified  
785 with 0.01% formic acid. Fractions were analyzed by HR-ESI and fractions solely containing  
786 the aerobactin mass were pooled, concentrated, and lyophilized to afford pure aerobactin  
787 (6 mg).

788 ***Pyoverdine Ag1*** – For isolation of the mixture of pyoverdine Ag1, *Pseudomonas* sp. Ag1  
789 was streaked out on LB agar and grown for 2 days at 30°C. A colony was picked and  
790 grown overnight in LB media and grown overnight at 30°C at 250 rpm. The overnight  
791 culture was used to inoculate four 4 L unbaffled Fernbach flasks each with 1 L of M9  
792 minimal media. The cultures were grown at 28°C at 200 rpm for 5 days. The resulting  
793 culture was centrifuged, and the supernatants were taken. A portion of the supernatants  
794 (300 mL) was lyophilized and then extracted with MeOH (300 mL) and dried *in vacuo*. The

795 crude material was fractionated by preparative reversed-phased HPLC using the following  
796 gradient, monitored at 405 nm: 0–10 minutes, isocratic 100% H<sub>2</sub>O; 10–15 minutes, linear  
797 gradient from 0% MeCN to 30% MeCN; 15–40 minutes, linear gradient from 30% MeCN  
798 to 60% MeCN; 40–50 minutes, linear gradient from 60% MeCN to 100% MeCN; 50–55  
799 minutes, isocratic 100% MeCN. Both HPLC solvents were acidified with 0.01% formic  
800 acid. Fractions were analyzed by LCMS HR-ESI and fractions solely containing the  
801 pyoverdine Ag1 mass were pooled, concentrated, and lyophilized to afford pure  
802 pyoverdine Ag1 (0.2 mg).

803 **Partial structure elucidation of pyoverdine Ag1.** The structure of pyoverdine Ag1 was  
804 partially characterized through mass spectrometry and biosynthetic considerations.  
805 LCMS-TOF analysis of *Pseudomonas* sp. Ag1 extracts indicated a UV peak absorbing at  
806 405 nm with a *m/z* equal to 647.78512 ([M+2H]<sup>2+</sup>). From this, a molecular formula of  
807 C<sub>53</sub>H<sub>79</sub>N<sub>15</sub>O<sub>23</sub> was predicted, which is similar to other characterized pyoverdines. Based  
808 on the MS/MS profile of the pyoverdine, along with biosynthetic considerations from the  
809 BGC (**Data Set S2**), the peptide sequence along with the chromophore structure were  
810 predicted (**Fig. S4**). The peptide sequence (Chromophore-Ser-fhOrn-Lys-Thr-Asn-Gly-  
811 Ser-fhOrn) varied slightly from the adenylation predictions from antiSMASH  
812 (Chromophore-Ser-fhOrn-Gly-Thr-Ala-Gly-Ser-fhOrn). Absolute configuration of amino  
813 acids was predicted based on presence and location of epimerase domains within the  
814 pyoverdine BGC. Additionally, our analysis indicates a linear peptide sequence, while  
815 similar pyoverdines are cyclized through the C-terminal amino acid and the threonine  
816 residue. The linear peptide sequence may be due to hydrolysis during preparation or  
817 analysis. Further NMR work would be needed for unambiguous structure assignment.

818

819 Anti-*Plasmodium* liver-stage assays

820 Luciferase-expressing *P. berghei* ANKA (NYU Langone Medical Center Insectary Core  
821 Facility) harvested from *A. stephensi* salivary glands were used to infect HuH7  
822 hepatocytes as previously described (Derbyshire et al., 2012). Cells were seeded 24 hours  
823 before infection at 4,000 cells/well in a 384-well plate. Compounds were added in triplicate  
824 in a dose dependent manner 30 minutes prior to infection. As a negative control, 0.1%  
825 DMSO was used. HuH7 cell viability and parasite load were determined 44 hours post  
826 infection using CellTiter-Fluor (Promega) and Bright-Glo (Promega) reagents,  
827 respectively, according to manufacturer's protocols. An EnVision plate reader (Perkin  
828 Elmer), was used to measure relative fluorescence and luminescence. EC<sub>50</sub> values were  
829 calculated by GraphPad Prism from two biological replicates.

830

#### 831 Anti-Plasmodium blood-stage assays

832 *P. falciparum* 3D7 parasite (MRA-102) was obtained from BEI Resources and cultured as  
833 previously described (Radfar et al., 2009; Raphemot et al., 2019). Parasites were  
834 synchronized with 5 % D-sorbitol (Sigma) at 37°C for 10 minutes and adjusted to 2 %  
835 parasitemia and 2 % hematocrit prior to the assay. One-hundred µL of the culture was  
836 dispensed into each well of a 96-well black plate (Corning) containing 100 µL medium in  
837 the presence or absence of siderophores (0–100 µM final concentration) in triplicate. Each  
838 well contained 0.5% DMSO. The plate was incubated at 37°C for 72 hours. Cells were  
839 lysed with 40 µL lysis buffer (20 mM Tris-HCl, pH 7.5, 5 mM EDTA dipotassium salt  
840 dihydrate, 0.16 % saponin, 1.6 % Triton X-100) containing fresh 1x SYBR Green I  
841 (ThermoFisher Scientific) at room temperature in the dark for 24 hours (Kato et al., 2016).  
842 The relative parasite loads were determined using an EnVision 2105 plate reader  
843 (PerkinElmer) at 535 nm with excitation at 485 nm. EC<sub>50</sub> values were calculated by  
844 GraphPad Prism from two biological replicates.

845

846 Mosquito rearing and assessment of microbiome siderophores on *A. gambiae* fecundity  
847 and survival

848 *A. gambiae* G3 strains were reared under standard conditions as previously described  
849 (28°C +/- 1°C, 12-hour dark/light cycle) (Kukutla et al., 2013). All mosquitoes were  
850 provided 10% sucrose solution with 1% of the siderophore solubilized in DMSO or solely  
851 1% DMSO as a vehicle control. The sucrose solution was changed daily. Mice were  
852 provided as a blood source for egg production. Live and dead mosquitoes were monitored  
853 and counted every day. After exposure to a blood meal, engorged female mosquitoes  
854 were counted and separated from mosquitoes that did not feed. Ovaries of engorged  
855 females were dissected three days post blood meal and the number of eggs per mosquito  
856 were counted for fecundity assessment. All siderophore-feeding experiments were  
857 completed with 100 female *A. gambiae* mosquitoes per siderophore and completed in  
858 biological triplicate.

859

860 **QUANTIFICATION AND STATISTICAL ANALYSIS**

861 Serratiochelin A calibration curve generation and concentration quantification within *A.*  
862 *stephensi* & *A. gambiae*

863 To generate a calibration curve for serratiochelin A, samples at 1 µg mL<sup>-1</sup>, 100 ng mL<sup>-1</sup>,  
864 and 10 ng mL<sup>-1</sup> were prepared in MeCN and subject to LCMS-ESI using the same method  
865 as above. An extracted ion current (EIC) of serratiochelin A (scan width of ± 5 ppm) was  
866 generated using Agilent MassHunter Workstation software. The areas under the curves  
867 were plotted to generate the linear equation. Three mosquito samples of *A. stephensi* (23  
868 days PBM from NYU insectary), where n = 50 for each, were washed, dried, and ground  
869 as previously reported. The grounds were separately extracted with 10 mL of MeOH and  
870 concentrated *in vacuo*. The same extraction protocol was followed for samples of *A.*  
871 *gambiae*. The following *A. gambiae* samples were tested: 1) 50 male, 0 day sugar-fed, 2)

872 50 female, 0 day sugar-fed, 3) 50 male, 3 day sugar-fed, 4) 50 female, 3 day sugar-fed,  
873 5) 50 male, 7 day sugar-fed, 6) 50 female, 7 day sugar-fed, 7) 50 male, 10 day sugar-fed,  
874 8) 50 female, 10 day sugar-fed, 9) 50 female, 1 day PBM, 10) 50 female, 2 day PBM, 11)  
875 50 female, 3 day PBM, 12) 50 female, 4 day PBM. The resulting extract was solubilized in  
876 MeCN (1.0 mL for *A. stephensi*, and 0.03 mL for *A. gambiae*) and analyzed under the  
877 same HR LCMS-ESI conditions used for all metabolomic studies. At this dilution factor the  
878 abundance of the serratiochelin A EIC for *A. stephensi* was within our calibration curve  
879 (See **Figure S7** for more details).

880

#### 881 Statistical Information

882 GraphPad Prism 7 software was used for data analysis. Results are represented as  
883 means +/- the standard error of the means (SEM). Statistical tests were performed using  
884 either one-way or two-way analysis of variance (ANOVA) with Dunnett's multiple  
885 comparison tests, two-tailed Student's t-test, unpaired Student's t-test, or Mantel-Cox test,  
886 where appropriate.

887

888

#### 889 **DATA AND SOFTWARE AVAILABILITY**

890 Data sets of the BGCs and the BGC analysis are available as supplementary materials  
891 (See **Data Sets 1–2**). Metabolomic data is available as a supplementary data set (**Data**  
892 **Set 3**). Software used herein are available for either download or online usage. This study  
893 did not generate any unique code.

894

#### 895 **Supplemental Figures.**

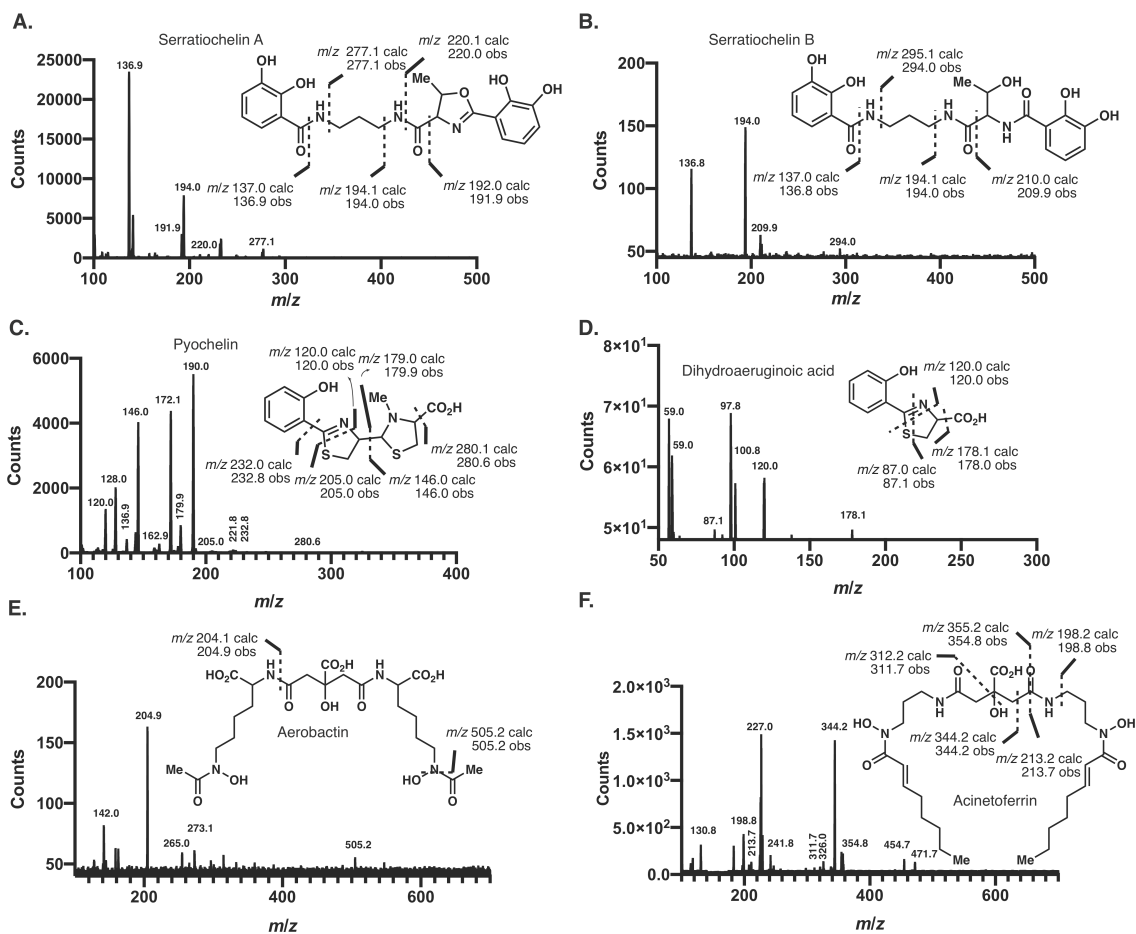

896

897 **Figure S1. Product Ion Spectra for Mosquito-Microbiome Siderophores.**

898

899 Product ion spectra with predicted and observed fragment ions for (A) serratiochelin A,  
 900 (B) serratiochelin B, (C) pyochelin, (D) dihydroaeruginic acid, (E) aerobactin, and (F)  
 901 acinetoferrin.

902



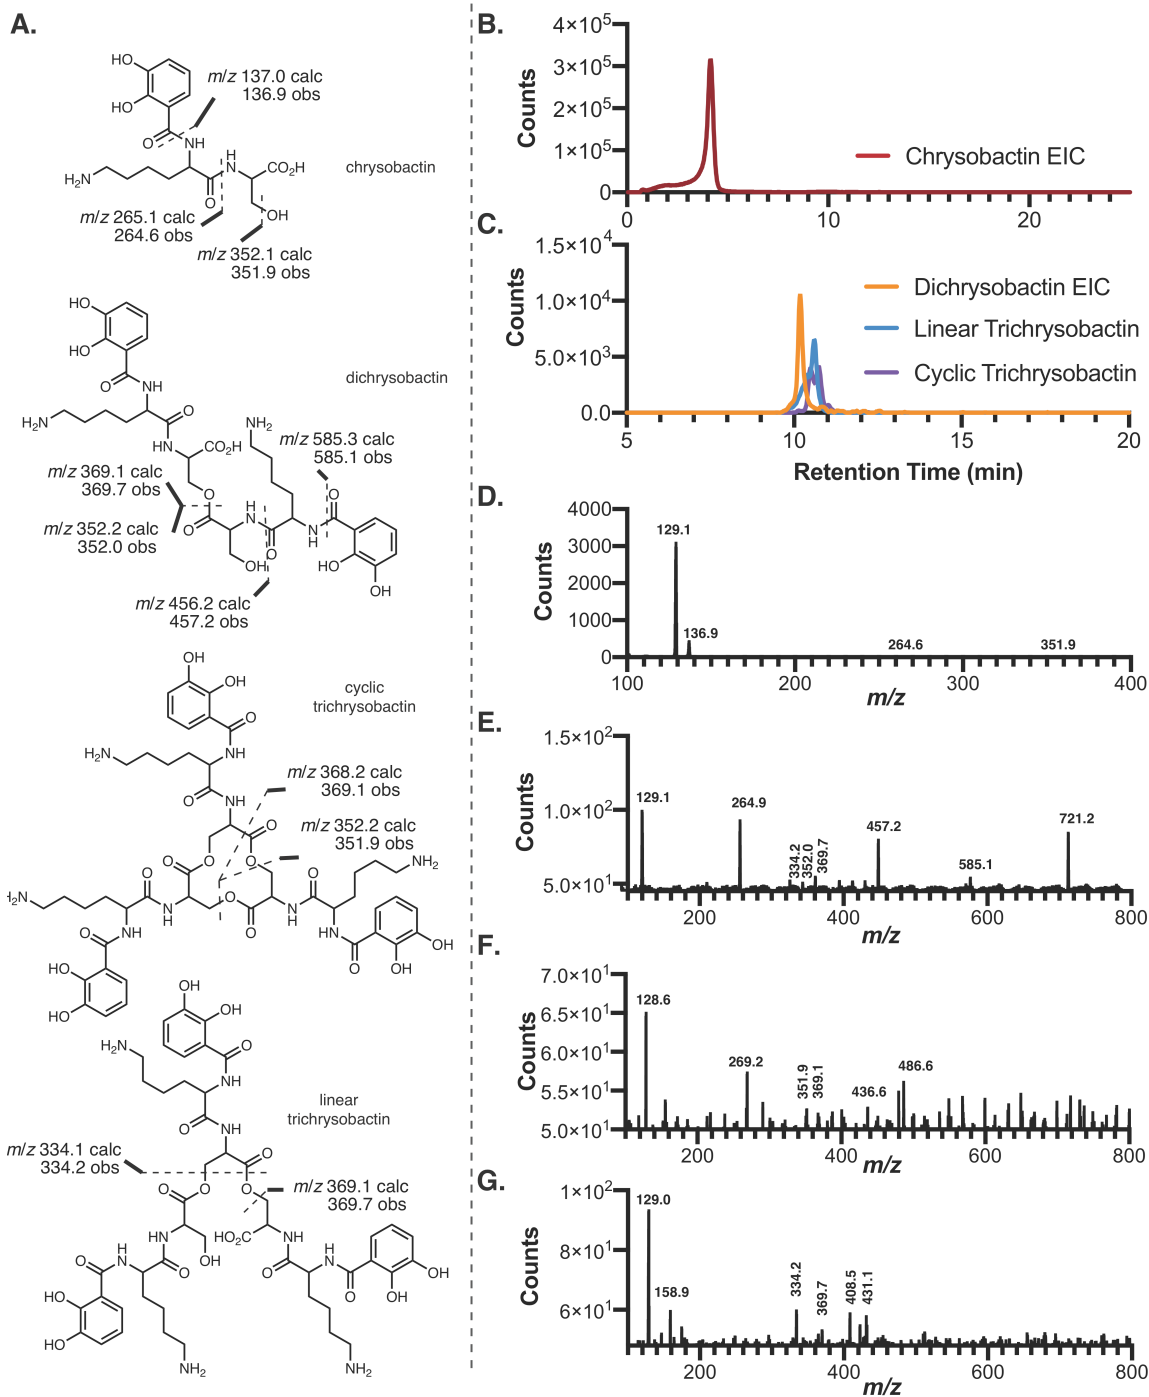

903

904 **Figure S2. Identification and Confirmation of Production of Chrysobactins by**  
 905 ***Serratia* sp.**

906

907 (A) Structures of chrysobactin, dichrysobactin, cyclic trichrysobactin, and linear  
 908 trichrysobactin as well as the predicted and observed fragment ions. (B) EIC of  
 909 chrysobactin from *Serratia* sp. extracts ( $[M+H] = 370.1609$   $m/z$ ). (C) EICs of dichrysobactin

910 (orange,  $[M+H] = 721.3039$   $m/z$ ), linear trichrysobactin (blue,  $[M+H] = 1072.4469$   $m/z$ ),

911 and cyclic trichrysobactin (purple,  $[M+H] = 1054.4364$   $m/z$ ). Product ion spectra for **(D)**  
912 chrysobactin, **(E)** dichrysobactin, **(F)** cyclic trichrysobactin, and **(G)** linear trichrysobactin.  
913

914

915

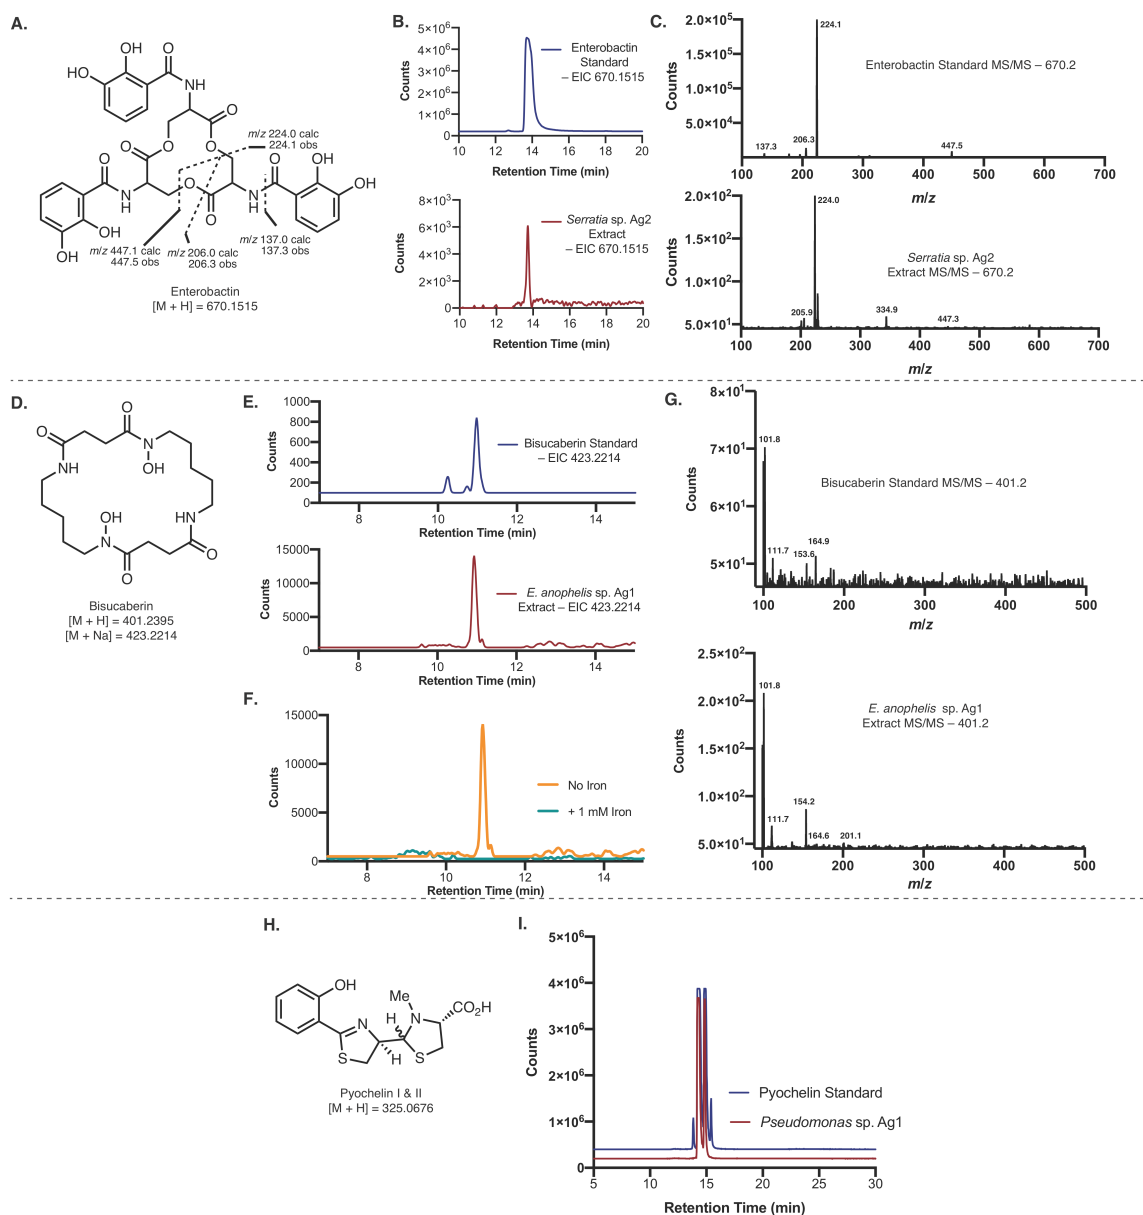

916

917 **Figure S3. Identification and Confirmation of Production of Enterobactin by *Serratia***  
 918 **sp. Ag2, Bisucaberin by *E. anophelis* Ag1, and Pyochelin by *Pseudomonas* sp. Ag1.**  
 919

920 (A) Structure of enterobactin and the predicted and observed fragment ions. (B) EICs of  
 921 the enterobactin mass ( $[M+H] = 670.1515$   $m/z$ ) from the enterobactin authentic standard  
 922 (blue) and from *Serratia* sp. Ag2 extracts (red). (C) Product ion scan of the enterobactin  
 923 mass of the enterobactin authentic standard (top) and the *Serratia* sp. Ag2 extracts  
 924 (bottom). (D) Structure of bisucaberin. (E) EICs of the bisucaberin mass ( $[M+Na] =$   
 925  $423.2214$   $m/z$ ) from the bisucaberin authentic standard (blue) and from *E. anophelis* Ag1  
 926 extracts (red). (F) EICs of the bisucaberin from *E. anophelis* extracts when grown without  
 927 iron (orange) and with 1 mM  $FeCl_3$  (teal). (G) Product ion scan of the bisucaberin mass  
 928 of the bisucaberin authentic standard (top) and the *E. anophelis* Ag1 extracts (bottom). (H)

929 Structure of pyochelin I & II. (I) EICs of the pyochelin mass ( $[M+H] = 325.0676$   $m/z$ ) from  
930 the pyochelin authentic standard (blue) and from *Pseudomonas* sp. Ag1 extracts (red).  
931



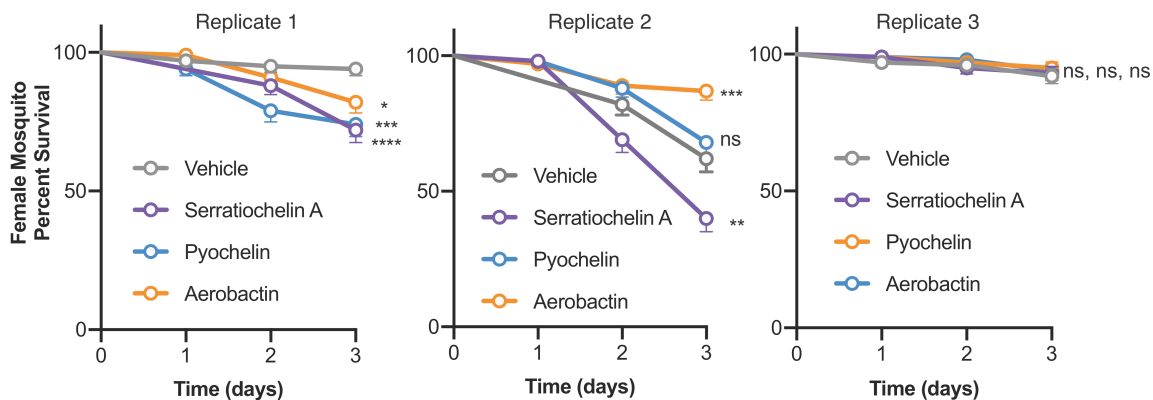

946

947 **Figure S5. Mosquito Survival Curves with Siderophore Supplementation.**

948

949 (A) Survival curves of female mosquitoes (t = 1–3 days) supplemented with siderophores  
950 (100  $\mu$ M) before a blood meal. The three panels represent the data from three separate  
951 biological replicates (n = 100 mosquitoes each). The error bars represent the mean +/- the  
952 standard error (Log-rank (Mantel-Cox) test, ns = not significant, \*  $P < 0.05$ , \*\*  $P < 0.01$ , \*\*\*  
953  $P < 0.001$  \*\*\*\*  $P < 0.0001$ ).

954

955

956

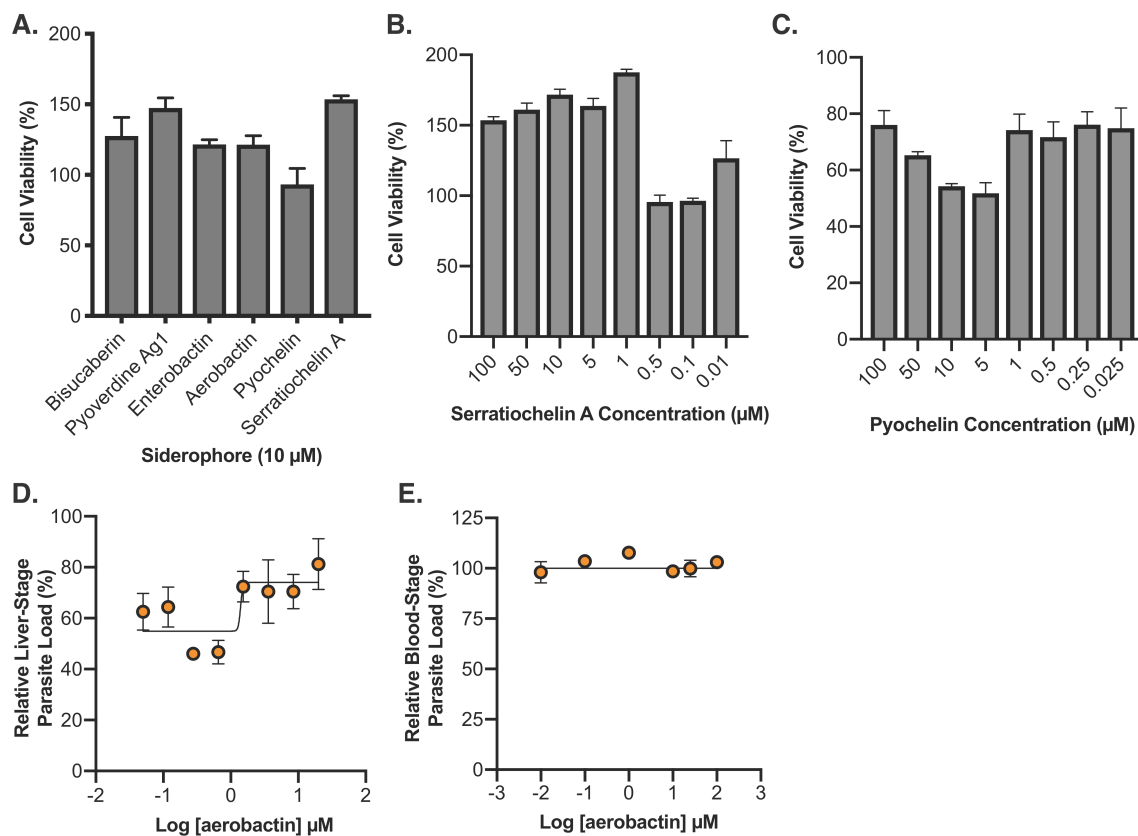

957

958 **Figure S6. Cell Viability Evaluation of Siderophores and Antimalarial Dose-Down**  
959 **Curves for Aerobactin**

960

961 (A) Cell viability of microbiome siderophores at 10  $\mu\text{M}$  against HuH7 cells normalized to  
962 the vehicle control. Cell viability dose-down of (B) serratiochelin A and (C) pyochelin  
963 against HuH7 cells. Dose-down analysis of aerobactin against (D) *P. berghei* ANKA  
964 parasite load in HuH7 cells and (E) *P. falciparum* 3D7 parasite load in human RBCs.

965

966

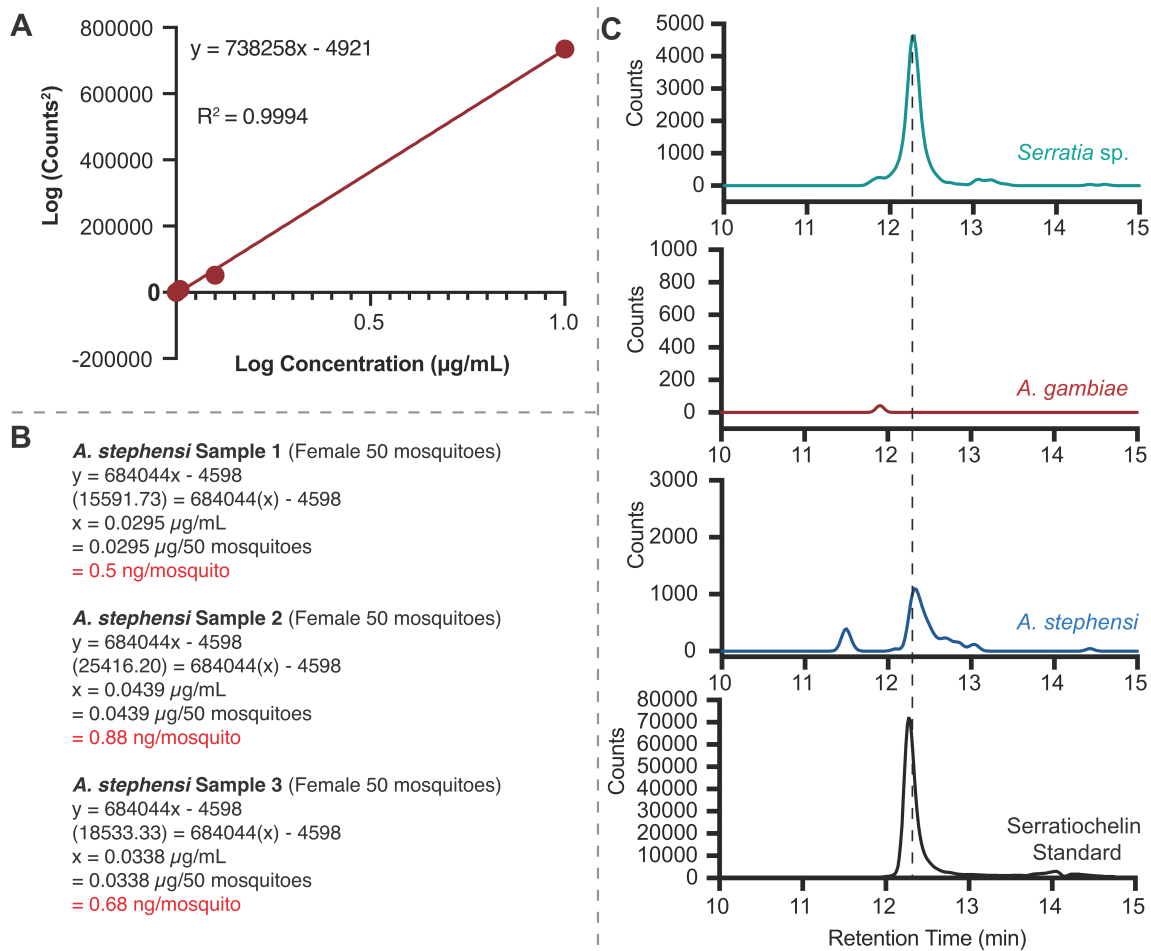

967

968

969

970

971

972

973

974

975

976

977

978

**Figure S7. Determination of Serratiochelin A Concentration in Mosquitoes.**

(A) Calibration curve for serratiochelin A. (B) Calculations to determine serratiochelin A amount per mosquito in three separate lab-reared *A. stephensi* samples. (C) EIC of the serratiochelin A *m/z* from *Serratia* sp. culture extracts, *A. gambiae* female mosquitoes, *A. stephensi* female mosquitoes, and a serratiochelin A standard.



979 **Additional Files**

980 **Supplementary Data Set 1.** (A) Bacterial strains, isolation source, and number of BGCs  
981 from bioinformatic analysis. (B) Accession numbers, nucleotide locations, BGC  
982 classifications, and CF probability of all BGCs. (C) Functional prediction of aS BGCs. (D)  
983 Dereplicated/duplicated aS BGCs. (E) Strains used in this study.

984

985 **Supplementary Data Set 2.** Detailed bioinformatic analysis to determine closest  
986 characterized BGC of aS clusters with predicted functions.

987

988 **Supplementary Data Set 3.** Data for differential metabolomics for *Serratia* sp.,  
989 *Pseudomonas* sp. Ag1, and *Enterobacter* sp. Ag1 grown in depleted and high iron.

990
